# Supplementary material
Source: publisher figshare collection journal article supplement (https://acs.figshare.com/ndownloader/files/5385266)
Supplement: Supplementary file 1 [file 5385266]

data_250214_c2
_audit_creation_date              2014-10-21
_audit_creation_method
;
Olex2 1.2
(compiled 2014.09.19 svn.r3010 for OlexSys, GUI svn.r4874)
;
_shelxl_version_number            2014/6
_publ_contact_author_address      Institut de Min�ralogie, de Physique des Mat�riaux et de Cosmochimie,Universit� UPMC, Desk 2324.3.15 Case courrier 115 ,4 Place Jussieu, 75252 Paris Cedex 05, France
_publ_contact_author_email        moutaabbid@impmc.upmc.fr
_publ_contact_author_name         'Hicham Moutaabbid'
_publ_contact_author_phone        + 33 01 44 27 58 97
_publ_section_references
;
Dolomanov, O.V., Bourhis, L.J., Gildea, R.J, Howard, J.A.K. & Puschmann, H.
 (2009), J. Appl. Cryst. 42, 339-341.

Palatinus, L. & Chapuis, G. (2007). J. Appl. Cryst., 40, 786-790;
Palatinus, L. & van der Lee, A. (2008). J. Appl. Cryst. 41, 975-984;
Palatinus, L., Prathapa, S. J. & van Smaalen, S. (2012). J. Appl. Cryst. 45,
 575-580

Palatinus, L. & Chapuis, G. (2007). J. Appl. Cryst., 40, 786-790;
Palatinus, L. & van der Lee, A. (2008). J. Appl. Cryst. 41, 975-984;
Palatinus, L., Prathapa, S. J. & van Smaalen, S. (2012). J. Appl. Cryst. 45,
 575-580.

ShelXL (Sheldrick, 2008)

ShelXS (Sheldrick, 2008)

Sheldrick, G.M. (2008). Acta Cryst. A64, 112-122

Sheldrick, G.M. (2008). Acta Cryst. A64, 112-122.
;
_chemical_name_common             Vanadium Sulfide (5/8)
_chemical_name_systematic         Vanadium Sulfide
_chemical_formula_moiety          '0.5(S16 V10)'
_chemical_formula_sum             'S8 V5'
_chemical_formula_weight          511.18
_chemical_melting_point           ?
_chemical_oxdiff_formula          V5S8
loop_
  _atom_type_symbol
  _atom_type_description
  _atom_type_scat_dispersion_real
  _atom_type_scat_dispersion_imag
  _atom_type_scat_source
 'S' 'S' 0.1246 0.1234 'International Tables Vol C Tables 4.2.6.8 and 6.1.1.4'
 'V' 'V' 0.3005 0.5294 'International Tables Vol C Tables 4.2.6.8 and 6.1.1.4'

_shelx_space_group_comment
;
The symmetry employed for this shelxl refinement is uniquely defined
by the following loop, which should always be used as a source of
symmetry information in preference to the above space-group names.
They are only intended as comments.
;
_space_group_crystal_system       'monoclinic'
_space_group_IT_number            12
_space_group_name_H-M_alt         'C 1 2/m 1'
_space_group_name_Hall            '-C 2y'
loop_
  _space_group_symop_operation_xyz
 'x, y, z'
 '-x, y, -z'
 'x+1/2, y+1/2, z'
 '-x+1/2, y+1/2, -z'
 '-x, -y, -z'
 'x, -y, z'
 '-x+1/2, -y+1/2, -z'
 'x+1/2, -y+1/2, z'

_cell_length_a                    11.3766(10)
_cell_length_b                    6.6488(2)
_cell_length_c                    7.9146(7)
_cell_angle_alpha                 90
_cell_angle_beta                  134.461(16)
_cell_angle_gamma                 90
_cell_volume                      427.28(10)
_cell_formula_units_Z             2
_cell_measurement_reflns_used     998
_cell_measurement_temperature     293
_cell_measurement_theta_max       27.5260
_cell_measurement_theta_min       3.5720
_shelx_estimated_absorpt_T_max    ?
_shelx_estimated_absorpt_T_min    ?
_exptl_absorpt_coefficient_mu     7.141
_exptl_absorpt_correction_T_max   1.00000
_exptl_absorpt_correction_T_min   0.56226
_exptl_absorpt_correction_type    multi-scan
_exptl_absorpt_process_details
;
CrysAlisPro, Agilent Technologies,
Version 1.171.37.31 (release 14-01-2014 CrysAlis171 .NET)
(compiled Jan 14 2014,18:38:05)
Empirical absorption correction using spherical harmonics,
 implemented in SCALE3 ABSPACK scaling algorithm.
;
_exptl_absorpt_special_details    ?
_exptl_crystal_colour             black
_exptl_crystal_colour_primary     black
_exptl_crystal_density_diffrn     3.973
_exptl_crystal_density_meas       ?
_exptl_crystal_density_method     ?
_exptl_crystal_description        ''
_exptl_crystal_F_000              486
_exptl_crystal_size_max           0.14
_exptl_crystal_size_mid           0.12
_exptl_crystal_size_min           0.03
_exptl_transmission_factor_max    ?
_exptl_transmission_factor_min    ?
_diffrn_reflns_av_R_equivalents   0.0480
_diffrn_reflns_av_unetI/netI      0.0427
_diffrn_reflns_Laue_measured_fraction_full 0.996
_diffrn_reflns_Laue_measured_fraction_max 0.944
_diffrn_reflns_limit_h_max        14
_diffrn_reflns_limit_h_min        -14
_diffrn_reflns_limit_k_max        8
_diffrn_reflns_limit_k_min        -8
_diffrn_reflns_limit_l_max        10
_diffrn_reflns_limit_l_min        -10
_diffrn_reflns_number             2281
_diffrn_reflns_point_group_measured_fraction_full 0.996
_diffrn_reflns_point_group_measured_fraction_max 0.944
_diffrn_reflns_theta_full         26.000
_diffrn_reflns_theta_max          27.884
_diffrn_reflns_theta_min          3.583
_diffrn_ambient_temperature       293
_diffrn_detector                  'CCD plate'
_diffrn_detector_area_resol_mean  16.0318
_diffrn_detector_type             Sapphire3
_diffrn_measured_fraction_theta_full 0.996
_diffrn_measured_fraction_theta_max 0.944
_diffrn_measurement_details
;
#__ type_ start__ end____ width___ exp.time_
  1 omega  -76.00   64.00   1.0000    2.3150
omega____ theta____ kappa____ phi______ frames
    -      -29.4708   77.0000  -90.0000 140

#__ type_ start__ end____ width___ exp.time_
  2 omega  -17.00  124.00   1.0000    2.3150
omega____ theta____ kappa____ phi______ frames
    -       29.9396   77.0000  150.0000 141

#__ type_ start__ end____ width___ exp.time_
  3 omega  -17.00  124.00   1.0000    2.3150
omega____ theta____ kappa____ phi______ frames
    -       29.9396   77.0000 -120.0000 141

#__ type_ start__ end____ width___ exp.time_
  4 omega   35.00  129.00   1.0000    2.3150
omega____ theta____ kappa____ phi______ frames
    -       29.9396  178.0000 -120.0000 94

#__ type_ start__ end____ width___ exp.time_
  5 omega   35.00  129.00   1.0000    2.3150
omega____ theta____ kappa____ phi______ frames
    -       29.9396  178.0000  150.0000 94

#__ type_ start__ end____ width___ exp.time_
  6 omega  -37.00   -2.00   1.0000    2.3150
omega____ theta____ kappa____ phi______ frames
    -       29.9396  114.0000   52.0000 35

#__ type_ start__ end____ width___ exp.time_
  7 omega  -16.00  112.00   1.0000    2.3150
omega____ theta____ kappa____ phi______ frames
    -       29.9396   57.0000   30.0000 128
;
_diffrn_measurement_device        'four-circle diffractometer'
_diffrn_measurement_device_type   'Xcalibur, Sapphire3'
_diffrn_measurement_method        '\w scans'
_diffrn_orient_matrix_UB_11       0.0006880000
_diffrn_orient_matrix_UB_12       0.1042206000
_diffrn_orient_matrix_UB_13       -0.0184924000
_diffrn_orient_matrix_UB_21       0.0680793000
_diffrn_orient_matrix_UB_22       0.0136856000
_diffrn_orient_matrix_UB_23       0.1234972000
_diffrn_orient_matrix_UB_31       0.0547612000
_diffrn_orient_matrix_UB_32       -0.0183457000
_diffrn_orient_matrix_UB_33       -0.0129595000
_diffrn_radiation_monochromator   graphite
_diffrn_radiation_probe           x-ray
_diffrn_radiation_type            MoK\a
_diffrn_radiation_wavelength      0.71073
_diffrn_source                    'Enhance (Mo) X-ray Source'
_reflns_Friedel_coverage          0.000
_reflns_Friedel_fraction_full     .
_reflns_Friedel_fraction_max      .
_reflns_number_gt                 459
_reflns_number_total              526
_reflns_odcompleteness_completeness 100.00
_reflns_odcompleteness_iscentric  1
_reflns_odcompleteness_theta      26.32
_reflns_special_details
;
 Reflections were merged by SHELXL according to the crystal
 class for the calculation of statistics and refinement.
 
 _reflns_Friedel_fraction is defined as the number of unique
 Friedel pairs measured divided by the number that would be
 possible theoretically, ignoring centric projections and
 systematic absences.
;
_reflns_threshold_expression      'I > 2\s(I)'
_computing_cell_refinement
;
CrysAlisPro, Agilent Technologies,
Version 1.171.37.31 (release 14-01-2014 CrysAlis171 .NET)
(compiled Jan 14 2014,18:38:05)
;
_computing_data_collection
;
CrysAlisPro, Agilent Technologies,
Version 1.171.37.31 (release 14-01-2014 CrysAlis171 .NET)
(compiled Jan 14 2014,18:38:05)
;
_computing_data_reduction
;
CrysAlisPro, Agilent Technologies,
Version 1.171.37.31 (release 14-01-2014 CrysAlis171 .NET)
(compiled Jan 14 2014,18:38:05)
;
_computing_molecular_graphics     'Olex2 (Dolomanov et al., 2009)'
_computing_publication_material   'Olex2 (Dolomanov et al., 2009)'
_computing_structure_refinement   'ShelXL (Sheldrick, 2008)'
_computing_structure_solution
;
Superflip (Palatinus & Chapuis, 2007;Palatinus & van der Lee, 2008;
Palatinus et al., 2012)
;
_refine_diff_density_max          0.786
_refine_diff_density_min          -0.665
_refine_diff_density_rms          0.174
_refine_ls_extinction_coef        0.0358(18)
_refine_ls_extinction_expression  'Fc^*^=kFc[1+0.001xFc^2^\l^3^/sin(2\q)]^-1/4^'
_refine_ls_extinction_method      SHELXL
_refine_ls_goodness_of_fit_ref    1.103
_refine_ls_hydrogen_treatment     undef
_refine_ls_matrix_type            full
_refine_ls_number_parameters      38
_refine_ls_number_reflns          526
_refine_ls_number_restraints      0
_refine_ls_R_factor_all           0.0373
_refine_ls_R_factor_gt            0.0310
_refine_ls_restrained_S_all       1.103
_refine_ls_shift/su_max           0.000
_refine_ls_shift/su_mean          0.000
_refine_ls_structure_factor_coef  Fsqd
_refine_ls_weighting_details
'w=1/[\s^2^(Fo^2^)+(0.0315P)^2^+0.0653P] where P=(Fo^2^+2Fc^2^)/3'
_refine_ls_weighting_scheme       calc
_refine_ls_wR_factor_gt           0.0703
_refine_ls_wR_factor_ref          0.0742
_refine_special_details           ?
_olex2_refinement_description
;
;
_atom_sites_solution_hydrogens    .
_atom_sites_solution_primary      iterative
_atom_sites_solution_secondary    ?
loop_
  _atom_site_label
  _atom_site_type_symbol
  _atom_site_fract_x
  _atom_site_fract_y
  _atom_site_fract_z
  _atom_site_U_iso_or_equiv
  _atom_site_adp_type
  _atom_site_occupancy
  _atom_site_site_symmetry_order
  _atom_site_calc_flag
  _atom_site_refinement_flags_posn
  _atom_site_refinement_flags_adp
  _atom_site_refinement_flags_occupancy
  _atom_site_disorder_assembly
  _atom_site_disorder_group
 V1 V 0.77098(10) 0.0000 1.01413(15) 0.0108(3) Uani 1 2 d S T P . .
 V3 V 0.5000 0.28357(13) 1.0000 0.0082(3) Uani 1 2 d S T P . .
 S3 S 0.47721(14) 0.0000 0.7801(2) 0.0073(3) Uani 1 2 d S T P . .
 S2 S 1.05540(14) 0.0000 1.2775(2) 0.0075(3) Uani 1 2 d S T P . .
 V2 V 0.5000 0.0000 0.5000 0.0086(3) Uani 1 4 d S T P . .
 S1 S 0.70991(10) -0.24880(12) 0.74674(16) 0.0075(3) Uani 1 1 d . . . . .

loop_
  _atom_site_aniso_label
  _atom_site_aniso_U_11
  _atom_site_aniso_U_22
  _atom_site_aniso_U_33
  _atom_site_aniso_U_23
  _atom_site_aniso_U_13
  _atom_site_aniso_U_12
 V1 0.0090(5) 0.0148(5) 0.0070(5) 0.000 0.0050(4) 0.000
 V3 0.0081(4) 0.0087(5) 0.0071(5) 0.000 0.0052(4) 0.000
 S3 0.0089(6) 0.0069(6) 0.0097(6) 0.000 0.0078(5) 0.000
 S2 0.0070(6) 0.0084(6) 0.0068(6) 0.000 0.0047(5) 0.000
 V2 0.0070(6) 0.0097(6) 0.0078(7) 0.000 0.0048(5) 0.000
 S1 0.0066(5) 0.0068(5) 0.0090(5) 0.0006(3) 0.0054(4) 0.0004(3)

_geom_special_details
;
 All esds (except the esd in the dihedral angle between two l.s. planes)
 are estimated using the full covariance matrix.  The cell esds are taken
 into account individually in the estimation of esds in distances, angles
 and torsion angles; correlations between esds in cell parameters are only
 used when they are defined by crystal symmetry.  An approximate (isotropic)
 treatment of cell esds is used for estimating esds involving l.s. planes.
;
loop_
  _geom_bond_atom_site_label_1
  _geom_bond_atom_site_label_2
  _geom_bond_distance
  _geom_bond_site_symmetry_2
  _geom_bond_publ_flag
 V1 V3 3.0463(9) 3_545 ?
 V1 V3 3.0463(9) 7_657 ?
 V1 S3 2.4348(14) . ?
 V1 S2 2.3166(15) . ?
 V1 V2 2.9135(12) . ?
 V1 S1 2.3745(10) . ?
 V1 S1 2.3745(10) 6 ?
 V1 S1 2.4171(10) 4_657 ?
 V1 S1 2.4171(10) 7_647 ?
 V3 V1 3.0463(9) 3_455 ?
 V3 V1 3.0463(9) 7_657 ?
 V3 V3 2.8779(18) 5_667 ?
 V3 S3 2.4534(10) . ?
 V3 S3 2.4534(10) 5_657 ?
 V3 S2 2.3137(11) 3_455 ?
 V3 S2 2.3137(11) 7_657 ?
 V3 S1 2.3852(10) 3_455 ?
 V3 S1 2.3852(10) 4_657 ?
 S3 V3 2.4534(10) 5_657 ?
 S3 V2 2.4056(12) . ?
 S2 V3 2.3137(11) 7_657 ?
 S2 V3 2.3137(11) 3_545 ?
 V2 V1 2.9135(13) 5_656 ?
 V2 S3 2.4056(12) 5_656 ?
 V2 S1 2.3917(9) . ?
 V2 S1 2.3917(9) 6 ?
 V2 S1 2.3917(9) 5_656 ?
 V2 S1 2.3917(9) 2_656 ?
 S1 V1 2.4171(10) 7_647 ?
 S1 V3 2.3851(10) 3_545 ?

loop_
  _geom_angle_atom_site_label_1
  _geom_angle_atom_site_label_2
  _geom_angle_atom_site_label_3
  _geom_angle
  _geom_angle_site_symmetry_1
  _geom_angle_site_symmetry_3
  _geom_angle_publ_flag
 V3 V1 V3 56.38(3) 7_657 3_545 ?
 S3 V1 V3 136.52(3) . 7_657 ?
 S3 V1 V3 136.52(3) . 3_545 ?
 S3 V1 V2 52.53(4) . . ?
 S2 V1 V3 48.82(3) . 7_657 ?
 S2 V1 V3 48.82(3) . 3_545 ?
 S2 V1 S3 172.92(6) . . ?
 S2 V1 V2 134.54(5) . . ?
 S2 V1 S1 98.88(4) . 6 ?
 S2 V1 S1 98.88(4) . . ?
 S2 V1 S1 89.57(4) . 4_657 ?
 S2 V1 S1 89.57(4) . 7_647 ?
 V2 V1 V3 92.54(3) . 3_545 ?
 V2 V1 V3 92.54(3) . 7_657 ?
 S1 V1 V3 95.29(3) 4_657 7_657 ?
 S1 V1 V3 91.16(3) . 7_657 ?
 S1 V1 V3 50.36(3) . 3_545 ?
 S1 V1 V3 95.29(3) 7_647 3_545 ?
 S1 V1 V3 50.36(3) 6 7_657 ?
 S1 V1 V3 138.16(4) 7_647 7_657 ?
 S1 V1 V3 138.16(4) 4_657 3_545 ?
 S1 V1 V3 91.16(3) 6 3_545 ?
 S1 V1 S3 86.17(4) 6 . ?
 S1 V1 S3 86.17(4) . . ?
 S1 V1 S3 85.32(4) 4_657 . ?
 S1 V1 S3 85.32(4) 7_647 . ?
 S1 V1 V2 52.58(3) . . ?
 S1 V1 V2 121.36(3) 4_657 . ?
 S1 V1 V2 121.36(3) 7_647 . ?
 S1 V1 V2 52.58(3) 6 . ?
 S1 V1 S1 91.50(3) . 7_647 ?
 S1 V1 S1 171.48(4) 6 7_647 ?
 S1 V1 S1 91.50(3) 6 4_657 ?
 S1 V1 S1 88.32(5) 6 . ?
 S1 V1 S1 87.42(5) 4_657 7_647 ?
 S1 V1 S1 171.48(4) . 4_657 ?
 V1 V3 V1 123.62(3) 7_657 3_455 ?
 V3 V3 V1 61.812(15) 5_667 3_455 ?
 V3 V3 V1 61.812(15) 5_667 7_657 ?
 S3 V3 V1 136.13(3) 5_657 7_657 ?
 S3 V3 V1 136.13(3) . 3_455 ?
 S3 V3 V1 90.29(2) 5_657 3_455 ?
 S3 V3 V1 90.29(3) . 7_657 ?
 S3 V3 V3 140.22(3) 5_657 5_667 ?
 S3 V3 V3 140.22(3) . 5_667 ?
 S3 V3 S3 79.56(5) . 5_657 ?
 S2 V3 V1 94.00(4) 7_657 3_455 ?
 S2 V3 V1 48.90(3) 7_657 7_657 ?
 S2 V3 V1 48.90(3) 3_455 3_455 ?
 S2 V3 V1 94.00(4) 3_455 7_657 ?
 S2 V3 V3 51.54(3) 3_455 5_667 ?
 S2 V3 V3 51.54(3) 7_657 5_667 ?
 S2 V3 S3 167.06(5) 7_657 5_657 ?
 S2 V3 S3 88.93(3) 3_455 5_657 ?
 S2 V3 S3 167.06(5) 3_455 . ?
 S2 V3 S3 88.93(3) 7_657 . ?
 S2 V3 S2 103.08(5) 3_455 7_657 ?
 S2 V3 S1 87.81(4) 7_657 3_455 ?
 S2 V3 S1 98.65(4) 7_657 4_657 ?
 S2 V3 S1 98.65(4) 3_455 3_455 ?
 S2 V3 S1 87.81(4) 3_455 4_657 ?
 S1 V3 V1 136.67(3) 4_657 3_455 ?
 S1 V3 V1 50.05(3) 3_455 3_455 ?
 S1 V3 V1 136.67(3) 3_455 7_657 ?
 S1 V3 V1 50.05(3) 4_657 7_657 ?
 S1 V3 V3 95.18(3) 3_455 5_667 ?
 S1 V3 V3 95.18(3) 4_657 5_667 ?
 S1 V3 S3 86.44(4) 4_657 5_657 ?
 S1 V3 S3 86.44(4) 3_455 . ?
 S1 V3 S3 85.60(4) 3_455 5_657 ?
 S1 V3 S3 85.60(4) 4_657 . ?
 S1 V3 S1 169.64(5) 3_455 4_657 ?
 V1 S3 V3 93.07(4) . . ?
 V1 S3 V3 93.07(4) . 5_657 ?
 V3 S3 V3 100.44(5) 5_657 . ?
 V2 S3 V1 74.01(4) . . ?
 V2 S3 V3 128.88(2) . 5_657 ?
 V2 S3 V3 128.88(2) . . ?
 V3 S2 V1 82.28(4) 7_657 . ?
 V3 S2 V1 82.28(4) 3_545 . ?
 V3 S2 V3 76.92(5) 3_545 7_657 ?
 V1 V2 V1 180.0 5_656 . ?
 S3 V2 V1 53.45(3) 5_656 5_656 ?
 S3 V2 V1 53.45(3) . . ?
 S3 V2 V1 126.55(3) . 5_656 ?
 S3 V2 V1 126.55(3) 5_656 . ?
 S3 V2 S3 180.00(6) 5_656 . ?
 S1 V2 V1 127.95(3) 5_656 . ?
 S1 V2 V1 52.05(3) 6 . ?
 S1 V2 V1 52.05(3) . . ?
 S1 V2 V1 127.95(2) . 5_656 ?
 S1 V2 V1 52.05(3) 5_656 5_656 ?
 S1 V2 V1 52.05(3) 2_656 5_656 ?
 S1 V2 V1 127.95(2) 6 5_656 ?
 S1 V2 V1 127.95(3) 2_656 . ?
 S1 V2 S3 93.55(3) 6 5_656 ?
 S1 V2 S3 86.45(3) . . ?
 S1 V2 S3 86.45(3) 2_656 5_656 ?
 S1 V2 S3 93.55(3) . 5_656 ?
 S1 V2 S3 93.55(3) 5_656 . ?
 S1 V2 S3 86.45(3) 5_656 5_656 ?
 S1 V2 S3 93.55(3) 2_656 . ?
 S1 V2 S3 86.45(3) 6 . ?
 S1 V2 S1 92.47(4) 6 5_656 ?
 S1 V2 S1 87.52(4) 6 . ?
 S1 V2 S1 180.0 6 2_656 ?
 S1 V2 S1 87.53(4) 2_656 5_656 ?
 S1 V2 S1 180.0 . 5_656 ?
 S1 V2 S1 92.48(4) 2_656 . ?
 V1 S1 V1 88.50(3) . 7_647 ?
 V1 S1 V3 79.59(4) . 3_545 ?
 V1 S1 V2 75.37(3) . . ?
 V3 S1 V1 95.26(4) 3_545 7_647 ?
 V3 S1 V2 128.78(4) 3_545 . ?
 V2 S1 V1 127.45(4) . 7_647 ?

_shelx_res_file
;
TITL 250214_c2 in C2/m #12
CELL 0.71073 11.376617 6.648798 7.914568 90 134.4612 90
ZERR 2 0.001026 0.000217 0.000723 0 0.016 0
LATT 7
SYMM -X,+Y,-Z

SFAC S V
UNIT 16 10

L.S. 4
PLAN  20
TEMP 19.85
REM reset to C2/m #12
BOND
MORE -1
CONF
fmap 2
acta 52
OMIT -2 2 2
OMIT 2 2 1
REM <HKL>C:/Users/baptiste/Documents/DATA/DATA_xcalibur/Hicham/V5S8_Hicham_250
REM 32014/250214/250214_c2_OK_C2m/struct/olex2_250214_c2/250214_c2.hkl</HKL>

WGHT    0.031500    0.065300
EXTI    0.035801
FVAR       4.83570
V1    2    0.770977    0.000000    1.014126    10.50000    0.00901    0.01485 =
         0.00704    0.00000    0.00504    0.00000
V3    2    0.500000    0.283574    1.000000    10.50000    0.00815    0.00871 =
         0.00713    0.00000    0.00515    0.00000
S3    1    0.477210    0.000000    0.780097    10.50000    0.00887    0.00687 =
         0.00965    0.00000    0.00779    0.00000
S2    1    1.055396    0.000000    1.277520    10.50000    0.00697    0.00840 =
         0.00677    0.00000    0.00470    0.00000
V2    2    0.500000    0.000000    0.500000    10.25000    0.00698    0.00973 =
         0.00783    0.00000    0.00476    0.00000
S1    1    0.709910   -0.248800    0.746737    11.00000    0.00660    0.00679 =
         0.00897    0.00058    0.00543    0.00042
HKLF 4

REM  250214_c2 in C2/m #12
REM R1 =  0.0310 for     459 Fo > 4sig(Fo)  and  0.0373 for all     526 data
REM     38 parameters refined using      0 restraints

END

WGHT      0.0315      0.0653

REM Highest difference peak  0.786,  deepest hole -0.665,  1-sigma level  0.174
Q1    1   0.8377  0.0000  1.1580  10.50000  0.05    0.79
Q2    1   0.6631  0.0000  0.8387  10.50000  0.05    0.75
Q3    1   0.9685  0.0000  1.1243  10.50000  0.05    0.72
Q4    1   0.3932  0.0000  0.6173  10.50000  0.05    0.58
Q5    1   0.6393 -0.2343  0.6191  11.00000  0.05    0.58
Q6    1   0.4221  0.2996  1.0329  11.00000  0.05    0.57
Q7    1   1.0402  0.1315  1.2010  11.00000  0.05    0.57
Q8    1   1.1446  0.0000  1.4110  10.50000  0.05    0.57
Q9    1   0.5000  0.1324  0.5000  10.50000  0.05    0.56
Q10   1   0.4188  0.0000  0.5353  10.50000  0.05    0.55
Q11   1   0.7942 -0.2280  0.8995  11.00000  0.05    0.54
Q12   1   0.3680  0.0000  0.3030  10.50000  0.05    0.54
Q13   1   0.3983  0.0000  0.8064  10.50000  0.05    0.53
Q14   1   0.5000  0.4275  1.0000  10.50000  0.05    0.53
Q15   1   0.8754  0.0000  0.9278  10.50000  0.05    0.50
Q16   1   0.8632  0.0000  0.9933  10.50000  0.05    0.49
Q17   1   0.7500 -0.2500  1.0000  10.50000  0.05    0.49
Q18   1   0.7871 -0.1516  1.0817  11.00000  0.05    0.48
Q19   1   0.7110  0.0000  1.0799  10.50000  0.05    0.47
Q20   1   0.9547  0.0000  1.2547  10.50000  0.05    0.47
;
_shelx_res_checksum               23163
_shelx_hkl_file
;
   0   0   1 231198. 9385.38   3
   0   0  -2 2408.33 664.572   2
   0   0   2 1657.31 1030.95   3
   0   0   3 176754. 9538.41   3
   0   0  -3 186860. 8170.78   2
   0   0  -4 729292. 30920.1   1
   0   0   4 793399. 31376.3   3
   0   0   5 56971.5 5482.95   3
   0   0  -5 64581.9 5826.63   1
   0   0  -6 4587.50 1910.85   1
   0   0   6 2338.42 1341.66   3
   0   0   7 45815.1 5792.90   3
   0   0  -7 43453.9 5551.41   1
   0  -2   0 45157.8 2426.72   1
   0   2   0 46151.9 2924.12   2
   0   2   0 43001.0 2378.59   3
   0  -2   0 50207.1 2580.72   7
   0   2   1 18495.7 1643.75   3
   0   2   1 16581.1 1565.67   2
   0  -2  -1 13596.0 1428.82   7
   0  -2  -1 15575.4 1313.32   1
   0   2  -1 17538.8 1760.78   2
   0  -2   1 18219.6 1321.70   7
   0  -2  -2 32903.9 2501.89   1
   0  -2  -2 37871.5 2898.49   7
   0   2  -2 30800.7 2695.31   2
   0  -2   2 33067.5 2368.95   3
   0   2   2 33094.8 2193.87   2
   0  -2   2 29706.4 2008.05   7
   0   2   2 31356.0 2807.41   3
   0   2   3 20013.8 2673.60   3
   0   2  -3 18777.1 2198.01   2
   0  -2  -3 22194.4 2473.12   1
   0  -2   3 17599.9 2086.27   3
   0  -2  -3 20831.9 2642.39   7
   0   2  -4 1598.05 734.768   2
   0   2   4 1241.54 1459.12   3
   0   2  -4 1102.22 1251.43   1
   0  -2   4 3084.76 1238.39   3
   0  -2  -4 520.064 958.151   1
   0   2  -5 2857.12 1511.23   1
   0  -2   5 6618.38 2055.72   3
   0   2   5 5473.94 2304.90   3
   0  -2  -5 2624.21 1641.91   1
   0   2  -6 26920.5 4261.38   1
   0  -2   6 41369.0 5044.13   3
   0   2   6 37875.0 4933.02   3
   0  -2  -6 29140.6 4069.32   1
   0  -2   7 10091.5 2753.02   3
   0  -2  -7 8793.75 2650.54   1
   0   4   0 845769. 33003.0   2
   0  -4   0 818670. 31852.8   7
   0   4   0 874499. 31655.4   3
   0  -4   0 857182. 31659.0   1
   0   4   1 76647.0 5132.64   2
   0   4  -1 89716.2 5707.82   2
   0  -4  -1 72137.2 4248.94   1
   0   4   1 71823.4 4594.17   3
   0  -4   1 83883.7 4474.63   7
   0  -4  -1 81081.1 4931.03   7
   0  -4  -2 11571.2 1513.68   1
   0  -4  -2 12777.1 1919.48   7
   0   4   2 10343.1 1701.06   3
   0   4  -2 11564.1 2252.50   2
   0   4   2 13303.5 1797.32   2
   0  -4   2 11774.7 1460.05   7
   0  -4  -3 56144.0 4777.13   7
   0   4   3 57723.1 4955.33   3
   0  -4  -3 55716.7 4087.93   1
   0   4  -3 56735.0 5028.01   2
   0  -4  -4 528996. 23464.2   7
   0   4  -4 511566. 23215.3   2
   0   4  -4 564457. 24536.0   1
   0   4   4 504730. 23845.2   3
   0  -4  -5 19511.7 3330.81   7
   0   4   5 15387.3 3313.40   3
   0   4  -5 26582.1 4220.79   1
   0   4  -6 2063.50 1690.92   1
   0   4   6 584.482 810.193   3
   0  -6   0 38217.2 3546.59   7
   0   6   0 42542.1 4453.20   2
   0   6  -1 908.348 854.535   2
   0  -6  -1 41.0932 433.559   7
   0   6   1 2041.42 1131.60   2
   0   6  -2 39865.0 4791.17   2
   0   6   2 44937.2 4265.18   2
   0  -6  -2 42487.9 4305.81   7
   0  -6  -3-4.26477 714.740   7
   0   6  -3 170.643 1350.03   2
   0   6   3 297.626 528.188   3
   0   6   4 9703.16 2407.74   3
   0   6  -4 5107.52 2065.89   2
   0  -6  -4 13679.5 3031.59   7
   0   6  -4 8934.35 2742.76   1
   0   6   5 1306.31 957.917   3
   0   6  -5-488.581 1924.59   1
   0   8   0 295322. 16609.8   2
   0   8  -1 1926.84 1409.90   2
   0   8   1 243.304 1158.28   2
   0  -8  -2 49054.3 5330.95   7
  -1  -1   7 45234.8 5187.93   3
  -1   1   7 49928.4 5697.72   3
   1  -1  -7 41488.0 5474.72   1
   1   1  -7 44048.8 5388.62   1
   1   1  -6 30584.0 4154.74   1
  -1  -1   6 28108.4 3986.86   3
   1  -1  -6 34016.9 4337.61   1
  -1   1   6 31499.1 4319.65   3
   1  -1  -5 11501.4 2419.74   1
  -1   1   5 12939.1 2591.90   3
  -1  -1   5 11456.3 2259.45   3
   1   1  -5 10906.1 2452.47   1
   1  -1  -4 4739.98 1579.59   1
  -1   1   4 3535.09 1303.38   3
   1   1  -4 3796.67 787.676   2
  -1  -1   4 4825.21 1568.30   3
  -1   1   3 94078.6 5585.35   3
  -1  -1   3 100441. 5629.91   3
   1   1  -3 87328.9 4501.29   2
   1   1  -2 22620.9 1689.61   2
  -1  -1   2 24348.1 1881.52   3
   1  -1  -2 22786.1 2154.53   7
  -1   1   2 21210.4 1904.67   3
  -1   1   1 67957.5 3308.15   3
   1   1  -1 72869.3 3512.06   2
  -1  -1   1 68784.0 3129.35   7
   1  -1  -1 76995.8 3450.24   7
  -1  -1   0 6871.11 774.563   7
   1   1   0 5729.41 791.590   2
   1  -1   0 6710.65 951.976   4
  -1   1   0 6538.74 969.457   2
   1  -1   1 33525.0 2364.27   3
   1   1   1 39855.2 2991.67   3
  -1  -1  -1 37303.6 2452.88   1
  -1  -1  -1 38606.4 2468.17   7
  -1   1  -1 44777.9 3044.29   2
  -1  -1  -2 980.157 964.277   1
  -1   1  -2 2622.93 907.965   2
  -1  -1  -2 2288.73 1008.72   7
   1  -1   2 1733.04 971.822   3
   1   1   2 1446.45 978.927   3
   1   1   2 1854.75 453.411   4
  -1   1  -3 217963. 10161.4   2
  -1  -1  -3 214096. 9446.19   2
  -1  -1  -3 191393. 10342.9   1
   1   1   3 202184. 11077.9   3
   1  -1   3 184477. 10240.2   3
  -1  -1  -4 17.2615 998.217   1
   1  -1   4-62.9866 742.495   3
  -1   1  -4 1098.49 1129.56   1
   1   1   4-233.785 1100.09   3
  -1   1  -5 436.926 995.248   1
  -1  -1  -5-1244.18 1131.81   1
   1   1   5 53.3703 658.286   3
   1  -1   5 1680.69 1325.55   3
   1  -1   6 5476.83 1973.60   3
   1   1   6 5730.70 2323.18   3
  -1  -1  -6 5003.44 1606.33   1
  -1   1  -6 8285.20 2130.95   1
   1   3  -7 10078.1 2876.77   1
  -1   3   7 9428.11 2901.59   3
   1  -3  -7 7533.78 2785.42   1
   1   3  -6 75795.9 7249.27   1
  -1   3   6 72183.4 7254.28   3
   1  -3  -6 78220.8 7026.83   1
  -1   3   5 62432.4 5916.17   3
   1   3  -5 58652.5 5834.01   1
   1  -3  -5 69574.2 5735.77   1
  -1  -3   5 51640.1 4409.38   7
  -1  -3   4 51195.6 3875.17   3
   1  -3  -4 57439.9 4480.11   1
  -1   3   4 49299.2 4564.57   3
   1   3  -4 57850.9 5095.90   1
   1  -3  -4 48514.6 4530.41   7
  -1  -3   4 50411.9 3647.62   7
   1   3  -4 45709.9 3983.04   2
  -1  -3   3 6785.65 1052.71   3
  -1  -3   3 6302.98 984.309   7
   1  -3  -3 7764.79 1605.03   7
   1   3  -3 7103.37 1547.81   2
   1  -3  -3 5479.83 1217.22   1
   1   3  -3 6652.38 1693.01   1
  -1   3   3 4704.28 1290.35   3
   1  -3  -2 113183. 5489.35   1
   1  -3  -2 112608. 5786.99   7
   1   3  -2 103403. 6088.34   2
  -1  -3   2 94073.9 5052.72   7
   1  -3  -2 102979. 4438.81   4
  -1   3   2 107332. 5471.44   2
  -1   3   2 102740. 5677.73   3
   1  -3  -1 4673.45 949.450   7
   1   3  -1 3942.72 742.394   5
   1  -3  -1 5184.13 1024.36   4
  -1   3   1 3840.11 927.040   3
  -1  -3   1 3326.92 803.355   7
   1   3  -1 4051.39 664.451   3
   1   3  -1 4752.77 1233.11   2
  -1   3   1 2853.93 927.585   2
   1  -3  -1 4583.02 864.858   1
   1   3   0 77906.3 4109.28   3
  -1   3   0 82124.5 4875.41   2
   1   3   0 85562.1 5057.35   2
  -1  -3   0 80078.8 3862.56   1
   1  -3   0 83828.3 4125.57   7
  -1  -3   0 84153.5 4555.83   7
   1  -3   0 81871.9 4471.16   1
  -1  -3  -1 3163.91 968.378   7
  -1  -3  -1 2279.43 562.373   1
   1   3   1 4243.46 1027.33   3
   1   3   1 2980.12 951.094   2
   1  -3   1 3491.62 661.899   7
  -1   3  -1 3244.55 1205.18   2
   1   3   2 30592.2 3116.15   3
  -1  -3  -2 27789.6 2346.38   1
  -1   3  -2 27135.4 2991.18   2
   1   3   2 23339.9 2261.12   2
   1  -3   2 24529.1 1861.02   7
  -1  -3  -2 26368.2 2703.63   7
  -1   3  -3 54716.7 4683.30   2
   1  -3   3 50088.5 4055.22   3
  -1  -3  -3 47913.4 4336.31   7
   1   3   3 49190.3 4890.08   3
  -1  -3  -3 50928.8 4098.72   1
  -1   3  -3 45799.9 4602.71   1
   1   3   4 28656.0 4063.33   3
  -1   3  -4 26540.6 3404.52   2
   1  -3   4 27197.7 3376.34   3
  -1   3  -4 20080.5 3478.34   1
  -1  -3  -4 30541.2 3454.49   1
  -1  -3  -4 27329.8 3581.40   7
   1  -3   5 15206.9 2975.65   3
  -1   3  -5 11132.3 2791.53   1
   1   3   5 9024.67 2621.51   3
   1   3   6 2414.84 1547.19   3
  -1   3  -6 1923.26 1590.14   1
   1   5  -6 3811.44 1810.55   1
  -1   5   6 1458.66 1703.12   3
   1   5  -5 2451.70 1957.22   1
  -1   5   5 958.575 817.245   3
   1   5  -5 765.438 643.896   2
   1  -5  -5 1626.82 1214.95   7
   1  -5  -4 2414.37 1359.48   7
   1   5  -4 4383.88 1799.40   2
  -1   5   4 1459.59 818.528   3
   1   5  -4 3597.05 1778.28   1
   1  -5  -3 101995. 7115.63   7
   1   5  -3 107949. 7743.79   2
  -1   5   3 105880. 6953.09   3
  -1  -5   2 3120.81 959.684   7
   1  -5  -2 2852.23 970.448   1
   1  -5  -2 1911.38 974.406   7
  -1   5   2 2716.92 1042.27   2
   1   5  -2 4106.82 1474.44   2
  -1   5   2 3993.17 1089.64   3
  -1   5   1 72946.2 4954.29   3
  -1  -5   1 79139.6 5066.76   7
  -1   5   1 79522.1 5678.07   2
   1  -5  -1 84765.2 5064.50   1
   1   5  -1 82310.7 6114.52   2
   1  -5  -1 85897.4 5295.00   7
   1   5   0 10708.7 2105.45   2
  -1   5   0 11695.6 1716.35   3
   1  -5   0 10872.8 1599.53   7
  -1   5   0 10284.0 2030.74   2
  -1  -5   0 7397.94 1502.27   7
   1   5   1 60202.2 4814.86   2
  -1   5  -1 59079.8 5261.77   2
   1   5   1 53373.9 4224.70   3
  -1  -5  -1 54860.8 4423.75   7
  -1   5  -2 22983.9 3364.60   2
   1   5   2 23978.3 3031.96   3
  -1  -5  -2 21444.3 2913.22   7
   1   5   2 25313.1 2918.72   2
  -1   5  -3 188911. 11545.1   2
   1   5   3 192894. 11336.8   3
  -1  -5  -3 168165. 10486.6   7
   1   5   4 4298.53 2175.70   3
  -1   5  -4 7542.38 2097.85   1
  -1   5  -4 12157.7 2611.47   2
  -1  -5  -4 7382.95 2436.64   7
  -1  -5  -5 5905.99 2043.68   7
   1  -5   5 6598.07 2484.70   4
   1   5   5 7542.49 3061.24   3
  -1   5  -5 9492.70 2767.02   1
   1  -7  -4 42265.8 5267.70   7
   1   7  -4 44199.0 5885.59   2
   1   7  -3-2159.94 1271.57   2
   1  -7  -3-948.605 1208.70   7
   1  -7  -2 64257.0 5564.86   7
   1   7  -2 63092.2 6398.64   2
  -1   7   2 61673.1 5688.24   2
   1   7  -1 10131.2 2405.38   2
  -1   7   1 10597.7 2279.86   2
  -1  -7   0 51340.8 4588.75   7
  -1   7   0 43574.0 5033.34   2
   1   7   0 47732.7 5118.88   2
  -1  -7  -1 7775.56 1941.37   7
   1   7   1 8498.30 2235.31   2
  -1   7  -1 8445.60 2585.38   2
   1  -7   1 11062.8 2663.72   4
  -1   7  -2 26251.6 4374.24   2
  -1  -7  -2 19257.7 3078.40   7
   1  -7   3 3601.71 1795.48   4
  -1   7  -3 4521.95 2169.45   2
  -1  -7  -3 8061.50 2428.23   7
  -2   0   8-3040.45 1676.94   3
   2   0  -8 2884.40 2043.00   1
   2   0  -7 2399.67 1347.80   1
  -2   0   7 371.822 994.230   3
   2   0  -6 30328.8 4136.35   1
  -2   0   6 40898.3 4431.93   3
  -2   0   5 7579.02 1960.58   3
   2   0  -5 11122.4 2418.81   1
  -2   0   4 6238.06 1499.74   3
  -2   0   3 31621.0 2535.50   3
  -2   0   2 35762.1 2161.11   3
   2   0  -2 43432.5 2545.35   5
  -2   0   1 35600.4 1879.70   6
   2   0  -1 31685.2 1889.41   5
   2   0   0 39468.6 2324.30   4
   2   0   0 36602.6 2245.63   3
   2   0   0 42241.4 2329.95   5
  -2   0  -1 11563.1 1631.93   2
  -2   0  -1 10312.2 1508.11   1
  -2   0  -1 14537.5 1509.42   7
   2   0   1 11825.7 1688.48   3
   2   0   1 15420.3 1538.46   4
   2   0   2 46501.9 3984.13   3
   2   0   2 42525.0 3286.15   4
  -2   0  -2 40370.2 3334.81   2
  -2   0  -2 41304.9 3686.79   1
   2   0   3 19970.1 3002.59   3
   2   0   3 20551.6 2487.90   4
  -2   0  -3 19235.1 2792.78   1
  -2   0  -3 25705.0 2670.82   2
  -2   0  -4 2081.70 1331.20   1
   2   0   4 2017.71 1522.63   3
  -2   0  -5 1839.72 1095.38   1
   2   0   5-460.215 1586.07   3
  -2   0  -6 39412.9 5209.19   1
   2   0   6 50463.7 5904.70   3
   2   2  -7 200034. 12669.9   1
   2  -2  -7 199065. 12842.2   1
  -2   2   7 198885. 13187.0   3
  -2   2   6 301087. 16702.0   3
   2  -2  -6 336411. 16936.9   1
   2   2  -6 353084. 17199.4   1
  -2  -2   6 307886. 15872.5   3
   2   2  -5 80590.3 6432.43   1
   2  -2  -5 75660.9 6031.08   1
  -2   2   5 82921.9 6361.74   3
  -2  -2   5 79527.7 5780.27   3
  -2  -2   4 33357.5 2855.63   7
  -2  -2   4 34804.0 2963.34   3
   2   2  -4 39892.2 3961.46   1
   2  -2  -4 28724.5 3058.09   1
  -2   2   4 36267.5 3524.09   3
   2   2  -4 31596.8 2726.73   2
   2  -2  -3 621826. 24478.0   7
   2   2  -3 626306. 23660.8   2
  -2   2   3 616698. 22279.7   2
   2   2  -3 591434. 24354.0   1
  -2   2   3 615900. 23903.8   3
  -2  -2   3 641622. 23131.2   7
   2  -2  -3 605941. 22169.8   4
   2   2  -3 606788. 22668.6   5
  -2  -2   3 592043. 22703.4   3
  -2  -2   2 794529. 28220.6   7
   2   2  -2 727373. 28845.5   2
  -2   2   2 768909. 27987.7   2
   2   2  -2 731149. 28577.4   1
   2  -2  -2 790150. 27836.0   4
   2   2  -2 791163. 27712.9   5
   2  -2  -2 714595. 28596.3   7
  -2   2   2 771036. 28585.0   3
  -2  -2   1 135979. 5372.22   6
   2  -2  -1 137245. 5606.58   7
  -2   2   1 136091. 6379.54   2
   2  -2  -1 131966. 6098.02   4
  -2   2   1 131057. 5345.31   6
   2   2  -1 129442. 5981.20   5
  -2  -2   1 132278. 5950.31   7
   2   2  -1 130999. 6490.10   2
  -2   2   1 146813. 6210.77   3
  -2  -2   0 90641.6 4606.86   7
   2  -2   0 91236.0 5075.78   4
   2   2   0 86817.0 4766.92   2
  -2   2   0 93285.6 5339.98   2
   2   2   0 88533.5 4721.25   3
  -2  -2  -1 595770. 22739.4   7
   2  -2   1 603476. 21306.7   7
  -2   2  -1 533154. 23676.5   2
   2   2   1 570415. 23725.5   3
  -2  -2  -1 579165. 22162.0   1
   2  -2   1 577435. 23589.9   4
   2  -2   1 638951. 22948.1   3
   2   2   2 492101. 22041.5   3
   2  -2   2 537116. 21021.0   3
  -2   2  -2 515369. 21715.8   2
  -2  -2  -2 519876. 20830.9   1
   2  -2   2 503651. 21499.7   4
  -2  -2  -2 502471. 20806.6   7
   2  -2   3 48551.5 4583.94   3
  -2   2  -3 55169.6 5152.99   1
  -2  -2  -3 60737.0 4857.00   1
   2  -2   3 59602.4 5180.93   4
  -2   2  -3 62741.1 5021.79   2
  -2  -2  -3 54857.5 4719.36   7
   2   2   3 55025.1 5320.58   3
  -2  -2  -4 15888.8 2630.67   1
  -2   2  -4 22540.9 3562.28   1
   2   2   4 17539.3 3315.55   3
   2  -2   4 16451.3 2905.40   4
   2  -2   4 8154.70 2128.39   3
   2   2   5 242405. 14191.3   3
  -2   2  -5 225099. 13473.3   1
   2  -2   6 115382. 9690.88   3
   2  -4  -7 5837.58 1988.98   1
   2   4  -7 7220.89 2337.72   1
  -2   4   7 3325.99 2279.93   3
  -2   4   6 11562.0 2736.26   3
   2  -4  -6 16018.8 2998.54   1
   2   4  -6 10806.5 2490.74   1
  -2  -4   5 13292.0 2003.61   7
   2   4  -5 22055.9 2936.71   2
   2  -4  -5 16702.2 2642.22   1
   2   4  -5 19115.1 3247.86   1
  -2   4   5 17995.8 2993.21   3
  -2   4   4-427.248 743.527   3
   2   4  -4 704.351 548.224   2
   2  -4  -4 290.858 427.923   1
   2  -4  -4-1159.38 1236.25   7
  -2  -4   4 402.669 584.240   7
   2   4  -4 1279.74 1293.69   1
   2  -4  -3 37244.5 3458.34   7
   2  -4  -3 30323.3 2843.90   1
  -2   4   3 37760.6 3442.80   3
  -2   4   3 32227.1 2829.90   2
   2   4  -3 34071.3 3345.71   1
   2   4  -3 38543.7 3811.24   2
  -2  -4   3 31333.4 2810.72   7
  -2   4   2 2646.18 1043.02   2
   2  -4  -2 4491.24 1161.49   1
   2   4  -2 4346.59 1325.96   2
   2  -4  -2 3346.69 875.876   7
  -2  -4   2 2817.95 903.686   7
   2  -4  -2 3704.90 803.635   4
  -2   4   2 3992.51 1146.90   3
   2  -4  -1 37184.2 3134.96   4
   2   4  -1 38797.1 3671.00   2
   2  -4  -1 34244.6 2875.54   1
  -2  -4   1 37140.4 3018.18   7
  -2   4   1 32102.6 2879.94   3
  -2   4   1 29796.2 3010.29   2
   2   4  -1 37133.7 2902.62   5
   2  -4  -1 34579.3 2617.40   7
  -2  -4   0 2350.73 1049.16   7
   2   4   0 1707.00 741.506   3
   2  -4   0 3342.62 760.312   7
  -2   4   0 3049.10 1114.88   2
   2   4   0 3954.45 1197.25   2
   2   4   1 21891.4 2579.21   2
  -2  -4  -1 21513.3 2626.81   7
  -2   4  -1 18406.0 2691.54   2
   2   4   1 22776.9 2664.57   3
  -2  -4  -2 6349.03 1670.85   7
   2   4   2 8129.81 1602.39   2
   2   4   2 6989.57 2008.71   3
  -2   4  -2 5782.86 1716.00   2
   2  -4   3 26661.9 4135.72   4
  -2  -4  -3 31462.0 3700.73   7
   2   4   3 28186.3 4020.18   3
  -2   4  -3 24392.8 3589.96   2
  -2   4  -4 921.674 1324.91   1
  -2   4  -4 1599.55 999.827   2
   2  -4   4 609.322 1559.48   4
  -2  -4  -4 1523.45 1597.28   7
   2   4   4-196.810 723.436   3
   2  -4   5 297.723 476.613   4
  -2   4  -5-947.351 1381.09   1
   2   4   5 1784.85 2003.80   3
  -2   6   6 111415. 9341.82   3
  -2   6   5 1284.16 838.498   3
   2   6  -5 3051.17 1585.05   2
  -2   6   4 57623.3 5467.58   3
   2  -6  -4 74999.6 6490.73   7
   2   6  -4 71366.6 6671.46   2
   2   6  -3 217874. 12972.5   2
   2  -6  -3 222275. 12023.8   7
  -2  -6   3 217840. 10979.0   7
  -2   6   3 229217. 11878.3   3
   2  -6  -2 325812. 14324.8   1
   2   6  -2 295309. 15802.5   2
   2  -6  -2 302921. 14376.6   7
  -2   6   2 292592. 14349.6   3
  -2  -6   2 302037. 14125.6   7
  -2   6   2 309913. 15044.1   2
  -2  -6   1 4295.78 1153.37   7
  -2   6   1 6205.34 1672.47   2
   2   6  -1 680.642 1224.93   2
  -2   6   1 8427.44 1637.18   3
   2  -6  -1 3585.74 1017.08   1
  -2   6   0 101050. 7558.83   2
   2  -6   0 107269. 7599.73   4
  -2  -6   0 97666.6 6676.22   7
   2   6   0 95333.9 7277.16   2
   2   6   1 215099. 11959.5   2
  -2   6  -1 219421. 13046.5   2
   2  -6   1 236977. 13396.0   4
  -2  -6  -1 219943. 11850.3   7
  -2   6  -2 209231. 12985.8   2
   2  -6   2 202793. 13206.5   4
  -2  -6  -2 201364. 11692.0   7
  -2  -6  -3 1257.00 1566.54   7
  -2   6  -3 2702.31 1361.96   2
   2  -6   3-291.788 765.825   4
  -2   6  -4 35716.3 5163.59   2
   2   8  -2 3316.98 1974.61   2
  -2   8   1 32834.9 4554.33   2
   2   8  -1 38794.0 5119.63   2
  -2   8   0 3577.65 2239.41   2
   2   8   0 2345.43 1809.57   2
  -2  -8   0 5316.62 1876.23   7
  -2  -8  -1 25202.8 3712.97   7
   2  -8   1 30216.0 5215.38   4
   3   1  -8 18783.5 3559.06   1
  -3   1   8 18422.8 3450.29   3
   3  -1  -8 17093.2 3560.11   1
   3   1  -7 87944.5 7515.05   1
  -3   1   7 67453.8 6719.13   3
   3  -1  -7 91835.4 7741.76   1
  -3  -1   7 79975.9 6660.74   3
  -3   1   6 27021.2 3823.24   3
   3   1  -6 26687.4 3666.53   1
  -3  -1   6 28376.6 3636.90   3
   3  -1  -6 25844.0 3763.11   1
  -3   1   5 3686.57 1432.94   3
   3  -1  -5 2065.43 1243.35   1
   3   1  -5 2578.20 1578.39   1
  -3  -1   5 3340.35 1412.44   3
   3   1  -4 1671.50 1134.28   1
  -3   1   4 139.986 513.959   3
   3   1  -4 1101.69 449.249   2
   3   1  -3 66584.4 3830.94   5
   3  -1  -3 67102.6 3531.26   4
  -3  -1   3 57109.9 3537.61   7
   3   1  -3 71297.7 4114.14   1
  -3   1   3 72525.1 3981.74   3
  -3  -1   3 65095.3 3448.99   3
   3   1  -3 63162.8 3602.29   2
   3   1  -2 37481.3 2437.67   5
   3  -1  -2 43704.6 2805.09   5
  -3   1   2 42688.9 2563.23   3
   3  -1  -2 42575.3 2622.93   4
  -3  -1   2 34997.6 2295.38   7
  -3   1   2 43540.4 2705.87   2
   3   1  -2 39031.8 2151.30   1
   3   1  -2 38118.4 2576.07   2
   3  -1  -1 35567.1 2183.73   5
   3   1  -1 34949.2 2410.38   5
   3   1  -1 34603.8 2311.92   4
  -3   1   1 31543.2 2024.05   6
   3   1  -1 33194.0 1839.92   3
   3  -1  -1 33600.6 2443.56   4
  -3   1   1 35007.6 2745.77   2
  -3  -1   1 33253.8 2069.09   6
  -3  -1   1 36242.7 2135.57   7
   3  -1   0 91083.4 4915.09   4
  -3   1   0 79516.4 5084.37   2
  -3  -1   0 97001.5 4366.58   1
   3   1   0 88320.1 4852.29   5
   3   1   0 84258.2 4181.98   4
   3  -1   0 80368.5 4056.20   5
   3  -1   0 81478.5 4525.77   3
   3   1   0 85323.9 4632.12   3
  -3  -1   0 83723.8 4212.32   7
  -3   1  -1 2628.89 1223.61   2
   3  -1   1 3444.98 870.450   5
  -3  -1  -1 3479.47 951.272   7
   3  -1   1 3547.64 1160.83   4
   3   1   1 4055.02 928.325   4
   3  -1   1 3781.49 1116.22   3
   3   1   1 4782.69 1420.10   3
  -3  -1  -1 4014.50 1255.72   1
  -3  -1  -2 5637.83 1449.70   7
   3   1   2 6051.61 1716.43   3
  -3   1  -2 8186.46 1913.00   1
   3  -1   2 6502.64 1439.65   5
  -3   1  -2 11388.6 1906.03   2
  -3  -1  -2 5108.48 1414.43   1
  -3  -1  -2 5208.59 1295.57   2
   3  -1   2 5927.10 1655.53   4
   3  -1   2 5953.44 1657.26   3
  -3  -1  -3 28201.0 3420.56   1
   3   1   3 23489.5 3586.54   3
  -3   1  -3 39265.2 3902.27   2
  -3   1  -3 26463.1 3547.54   1
   3  -1   3 26368.7 3702.33   3
   3  -1   3 32902.0 3579.73   4
  -3  -1  -4 72055.4 5984.72   1
  -3   1  -4 64202.0 6195.32   1
   3  -1   4 71093.0 6585.02   3
   3   1   4 78475.5 6929.05   3
   3   1   5 17034.1 3437.93   3
  -3   1  -5 18200.2 3378.49   1
   3  -1   5 20789.3 3565.35   3
   3  -3  -8-662.761 1968.61   1
  -3   3   7 17250.5 3359.23   3
  -3  -3   7 19116.8 3194.29   7
   3   3  -7 17173.2 3599.67   1
   3  -3  -7 22981.5 3769.11   1
   3  -3  -6 71282.8 6216.23   1
   3   3  -6 81638.5 6746.59   1
  -3  -3   6 68187.6 5510.95   7
  -3   3   6 78283.6 6599.70   3
  -3   3   5 13918.0 2402.20   3
   3  -3  -5 12256.9 2290.42   1
  -3  -3   5 12928.7 1951.36   7
   3   3  -5 14792.2 2679.98   1
   3   3  -5 12699.7 1898.15   2
  -3   3   4 28741.1 3109.26   3
  -3  -3   4 31352.3 2721.33   7
   3   3  -4 30410.7 3281.46   1
   3  -3  -4 32051.2 3087.74   1
   3   3  -4 31734.0 3113.31   2
  -3  -3   3 211.448 572.568   7
  -3   3   3 856.475 585.948   2
   3   3  -3 255.740 257.921   5
   3   3  -3 111.598 470.715   1
  -3   3   3-240.107 575.605   3
   3  -3  -3-116.561 502.975   4
   3   3  -3 50.7934 572.157   2
   3  -3  -3 1028.94 983.183   7
   3  -3  -3 759.065 725.870   1
   3  -3  -2 116667. 5989.56   4
  -3  -3   2 124044. 5360.86   6
   3   3  -2 123920. 5981.54   5
   3   3  -2 130376. 7153.18   2
  -3   3   2 131207. 6519.23   3
   3  -3  -2 126643. 6199.60   7
  -3   3   2 119952. 6336.71   2
  -3  -3   2 120678. 6187.86   7
   3   3  -2 125627. 5813.43   1
   3  -3  -1 5114.00 721.610   7
   3   3  -1 4529.81 804.827   3
  -3  -3   1 5159.50 1073.89   7
   3   3  -1 4665.09 1094.61   5
   3  -3  -1 5794.03 1182.94   4
  -3   3   1 6436.93 1498.05   2
   3   3  -1 4658.78 1301.61   2
  -3  -3   0 187122. 8599.23   7
  -3   3   0 183366. 9577.75   2
   3   3   0 164278. 8585.65   3
   3   3   0 173158. 8769.03   2
   3  -3   0 178830. 9136.76   4
   3  -3   1 55702.1 4679.35   4
  -3   3  -1 50264.6 4654.56   2
   3   3   1 59610.0 4792.98   3
  -3  -3  -1 52283.8 3960.31   7
   3  -3   2 43573.3 4585.09   4
  -3  -3  -2 43016.2 3894.32   7
  -3   3  -2 46652.7 4613.49   2
   3   3   2 49493.9 4945.95   3
  -3   3  -3-565.756 555.734   2
  -3   3  -3 547.761 1312.93   1
   3   3   3 312.027 625.714   3
   3  -3   3 2001.10 1108.10   3
   3  -3   3 215.413 836.926   4
  -3  -3  -3-464.436 739.679   7
  -3  -3  -4 139398. 9628.95   7
  -3   3  -4 150524. 10733.6   1
   3  -3   4 153354. 10573.6   4
   3  -3   4 142304. 10297.0   3
   3   3   4 146981. 10597.3   3
   3  -3   5 63485.9 7069.92   3
   3   3   5 60988.7 6847.83   3
   3   5  -7 85963.4 8033.06   1
   3  -5  -6 270.584 942.100   1
   3   5  -6 3064.80 1280.64   1
  -3   5   6 1495.94 1058.78   3
  -3  -5   5 13937.6 2173.68   7
  -3   5   5 14388.5 2509.50   3
   3   5  -5 16944.6 2673.81   2
   3  -5  -5 16872.1 2643.54   1
  -3  -5   4 18383.2 2373.35   7
   3  -5  -4 17267.5 2514.47   1
   3  -5  -4 22449.6 3137.67   7
   3   5  -4 18631.1 2999.59   2
  -3   5   4 12352.3 2273.38   3
   3  -5  -3 88421.8 5833.33   7
  -3  -5   3 82812.9 5409.30   7
  -3   5   3 87688.5 5718.35   2
  -3   5   3 78413.4 5706.38   3
   3  -5  -3 85680.7 5659.69   1
   3   5  -3 76442.6 6324.84   2
  -3   5   2 43.8694 647.811   3
  -3   5   2 181.135 827.312   2
   3  -5  -2 800.402 609.611   1
  -3  -5   2 267.037 704.398   7
   3   5  -2-1360.20 1387.67   2
   3   5  -1 59888.4 5086.75   2
   3  -5  -1 58086.6 4670.77   4
  -3   5   1 44801.4 4354.16   2
  -3  -5   1 60314.9 4495.90   7
   3  -5  -1 50570.1 4125.86   1
   3   5  -1 54786.0 4225.75   5
  -3   5   1 48442.1 4111.72   3
  -3   5   0 1596.37 959.494   2
   3   5   0 2111.47 1384.20   2
   3  -5   0 2915.45 1422.13   4
  -3  -5   0 3378.73 1330.87   7
  -3   5  -1 8228.89 1944.69   2
  -3  -5  -1 7071.60 1726.49   7
   3  -5   1 5560.51 1909.17   4
   3   5   1 6723.93 1815.05   2
   3  -5   2 5519.74 2143.90   4
  -3  -5  -2 3331.66 1513.00   7
  -3   5  -2 4961.61 1636.05   2
  -3   5  -3 48594.8 5563.94   2
   3  -5   3 57851.0 6314.26   4
   3   5   3 59148.1 6447.36   3
  -3  -5  -3 55685.9 5601.94   7
   3   5   4 18182.6 4317.96   3
   3  -5   4 23555.1 4513.73   4
  -3  -5  -4 22088.1 3667.76   7
  -3   7   5 11793.1 2814.96   3
   3   7  -5 14437.5 3284.54   2
   3  -7  -5 20881.4 4085.32   7
  -3   7   4 28648.9 3863.20   3
   3   7  -4 24308.9 4129.19   2
  -3  -7   3 5169.77 1563.35   7
  -3   7   3 3584.85 1484.73   3
   3   7  -3 1741.56 1214.46   2
   3   7  -2 60424.3 6306.53   2
  -3   7   2 74470.4 6451.61   2
  -3  -7   2 61195.6 5398.88   7
  -3   7   1 6535.43 1974.19   2
   3   7  -1 7776.82 2291.98   2
  -3  -7   1 6817.08 2024.59   7
  -3  -7   0 93445.4 6973.99   7
   3   7   0 84192.7 7253.26   2
  -3   7   0 85268.0 7656.93   2
   3  -7   0 105221. 8189.55   4
  -3  -7  -1 48589.3 4946.11   7
   3   7   1 40263.0 4956.98   5
  -3   7  -1 33808.2 4898.46   2
   3  -7   1 33831.1 5172.84   4
   3   7   1 37412.9 4511.95   2
  -3  -7  -2 29575.5 4124.33   7
   3  -7   2 26488.1 4718.89   4
  -3   7  -2 32577.1 4831.54   2
  -4   0   9 123704. 9850.26   3
   4   0  -8 288765. 16992.5   1
  -4   0   8 314704. 16787.5   3
  -4   0   7 1494.14 840.094   3
   4   0  -7 2661.73 1754.66   1
   4   0  -6 55008.3 5193.29   1
  -4   0   6 56158.2 4890.65   3
   4   0  -5 486608. 21243.3   1
  -4   0   5 523351. 20837.7   3
  -4   0   4 805849. 30185.2   3
   4   0  -3 56466.9 3474.28   4
   4   0  -3 56006.5 3267.95   1
   4   0  -3 63422.1 3833.70   5
  -4   0   2 94948.0 4408.30   7
   4   0  -2 103125. 4559.78   1
   4   0  -2 99403.7 5039.77   5
   4   0  -2 100353. 5073.58   4
  -4   0   2 105297. 4923.62   6
  -4   0   1 794377. 28020.6   7
  -4   0   1 797695. 28809.0   6
   4   0  -1 775647. 28971.5   5
   4   0  -1 728816. 29146.3   4
   4   0   0 642493. 25845.2   4
  -4   0   0 671261. 26890.0   2
   4   0   0 699228. 25960.5   3
  -4   0   0 670960. 24850.0   7
   4   0   0 695592. 25889.7   5
   4   0   1 27483.2 2823.12   5
   4   0   1 29658.6 2864.99   4
  -4   0  -1 26063.1 2771.18   1
  -4   0  -1 31346.9 3195.66   2
   4   0   1 27261.4 3057.41   3
  -4   0  -1 31304.4 2638.13   7
   4   0   2 48632.1 4863.52   3
  -4   0  -2 50562.1 4526.50   1
   4   0   2 51882.1 4230.96   4
  -4   0  -2 52208.0 4559.87   2
   4   0   2 54683.0 4614.77   5
   4   0   3 269918. 15078.0   3
  -4   0  -3 283544. 14423.0   1
   4   0   4 203326. 12857.8   3
  -4   0  -4 191940. 11812.2   1
  -4   0  -5 3296.53 2066.75   1
  -4  -2   8-3347.37 1965.31   7
  -4   2   8-1578.51 1353.38   3
   4  -2  -8 219.653 1627.18   1
   4   2  -8 465.908 1253.16   1
  -4  -2   7-1220.71 1029.98   7
   4  -2  -7 1669.72 1693.56   1
   4   2  -7 1020.50 1559.52   1
  -4   2   7-1528.94 1265.10   3
   4  -2  -6 26673.9 3492.55   1
  -4   2   6 26270.9 3391.44   3
   4   2  -6 31862.1 3983.21   1
  -4  -2   6 26058.5 3111.66   7
  -4  -2   5 10014.8 1620.36   7
  -4   2   5 12368.1 2110.29   3
   4   2  -5 11974.3 2414.94   1
   4  -2  -5 8336.64 1757.59   1
   4   2  -5 14370.8 1837.26   2
  -4  -2   4 8965.03 1399.40   7
   4  -2  -4 10799.1 1337.83   4
   4   2  -4 11912.8 1780.74   1
   4   2  -4 11773.5 1502.46   5
  -4   2   4 7994.33 1578.52   3
   4   2  -4 13475.1 1836.51   2
  -4   2   3 17874.8 1999.29   3
   4   2  -3 21281.8 1935.37   5
   4   2  -3 19237.1 2180.70   2
   4  -2  -3 21034.8 1995.39   4
  -4   2   3 20398.5 1992.94   2
   4   2  -3 18933.1 1729.59   1
  -4  -2   3 21156.7 1973.66   7
  -4  -2   2 22850.7 2049.33   7
  -4   2   2 23473.3 1895.99   6
  -4  -2   2 28731.5 2008.48   6
   4   2  -2 24668.3 2477.01   2
   4   2  -2 26737.2 2304.47   5
   4  -2  -2 27116.3 2399.57   4
  -4   2   2 32093.6 2901.76   2
   4  -2  -2 27773.8 2380.56   5
  -4   2   2 29119.4 2389.30   3
   4  -2  -1 24464.9 1992.37   5
   4   2  -1 22910.0 1836.59   3
   4   2  -1 26522.8 2557.38   5
   4  -2  -1 25207.0 2471.08   4
  -4   2   1 21067.4 2584.76   2
  -4  -2   1 24887.4 2125.69   7
   4   2   0 10669.5 1700.64   3
  -4  -2   0 9464.61 1420.80   7
  -4   2   0 11187.3 2051.77   2
   4   2   0 11194.1 1957.54   5
   4   2   0 10305.0 1425.76   4
   4  -2   0 9268.16 1706.28   4
   4  -2   0 9832.99 1130.57   5
  -4  -2  -1 8908.90 1531.28   7
   4   2   1 7726.76 1752.17   3
  -4   2  -1 7277.50 2000.11   2
   4  -2   1 11860.6 2123.02   4
   4  -2   1 7249.78 1635.81   3
   4   2   2 8287.99 2212.51   3
  -4   2  -2 10204.9 2254.19   2
  -4  -2  -2 10531.4 1864.20   7
   4  -2   2 8345.57 1966.13   4
   4  -2   2 9714.88 2263.76   3
  -4   2  -3 49946.9 5534.95   1
   4  -2   3 52187.7 5228.48   4
  -4   2  -3 53734.6 5273.80   2
   4  -2   3 54287.3 5572.71   3
   4   2   3 45719.4 5269.23   3
  -4  -2  -3 43664.9 4566.73   7
   4   2   4-1037.22 947.693   3
  -4   2  -4 808.415 1373.46   1
   4  -2   4-1400.92 1813.26   3
   4   4  -8 177139. 12199.4   1
   4  -4  -8 190425. 12899.7   1
  -4   4   7 8177.80 2168.84   3
   4   4  -7 9448.10 2364.37   1
  -4  -4   7 11563.7 2446.55   7
   4  -4  -7 10760.9 2827.20   1
  -4   4   6 9676.73 2131.34   3
   4   4  -6 10690.1 2300.46   1
   4  -4  -6 11284.8 2381.63   1
  -4  -4   6 9544.93 1931.33   7
   4   4  -5 302330. 14616.8   2
   4   4  -5 309215. 14787.1   1
   4  -4  -5 303116. 14424.2   1
  -4   4   5 298816. 14826.4   3
  -4  -4   5 305969. 13768.9   7
  -4   4   4 439809. 18673.6   3
   4   4  -4 416123. 19027.7   2
  -4  -4   4 403977. 17645.1   7
   4  -4  -4 446908. 18346.0   1
  -4  -4   3 57713.0 4178.57   7
  -4   4   3 57572.1 4439.61   3
   4   4  -3 61702.1 5160.10   2
   4  -4  -3 73747.4 4334.12   4
  -4   4   3 60952.7 4381.56   2
   4   4  -3 57311.1 3837.46   5
   4  -4  -3 70624.6 4666.04   7
   4  -4  -3 54396.7 4239.77   1
  -4  -4   2 19906.8 2270.27   7
   4   4  -2 16320.7 2067.08   5
   4  -4  -2 17225.7 2140.03   4
   4   4  -2 18032.8 2724.10   2
  -4   4   2 18153.5 2438.64   2
  -4   4   2 17770.3 2356.80   3
   4  -4  -2 23005.2 2485.07   1
   4   4  -1 417614. 17641.9   5
   4  -4  -1 427459. 17778.1   1
   4   4  -1 402124. 18054.3   2
   4  -4  -1 404595. 17756.6   4
  -4   4   1 393129. 18319.5   2
  -4  -4   1 405865. 17258.1   7
   4   4   0 407374. 17540.4   2
  -4  -4   0 380985. 16823.5   7
   4   4   0 373369. 17434.6   5
   4  -4   0 383238. 17600.3   4
  -4   4   0 394585. 18354.3   2
   4  -4   1 47567.6 4790.84   4
  -4   4  -1 51916.2 5131.88   2
   4   4   1 53592.5 4960.09   3
  -4  -4  -1 49995.2 4363.73   7
  -4   4  -2 10903.1 2576.56   2
   4   4   2 11789.6 2797.65   3
  -4  -4  -2 10254.0 2119.65   7
   4  -4   2 8814.09 2363.66   4
  -4   4  -3 172133. 11629.0   1
   4  -4   3 175272. 11684.8   4
  -4   4  -3 159059. 10707.5   2
   4   4   3 164171. 11357.4   3
  -4  -4  -3 151050. 10069.8   7
   4  -4   4 133532. 10433.2   4
   4   4   4 119721. 10091.7   3
  -4  -4  -4 128122. 9682.27   7
  -4   6   6 26525.6 3932.64   3
  -4  -6   5-428.162 623.036   7
  -4   6   5 1492.76 918.383   3
   4  -6  -5 343.403 549.439   1
   4   6  -5-870.390 1118.22   2
  -4  -6   4 22800.7 2839.36   7
  -4   6   4 20532.2 3047.81   3
   4  -6  -4 25885.9 3240.94   1
   4   6  -4 22013.7 3609.89   2
  -4  -6   3 236.429 942.728   7
  -4   6   3-1312.21 970.540   2
  -4   6   3-479.365 723.948   3
   4  -6  -3-1002.76 722.626   1
   4   6  -3 341.925 1050.16   2
  -4   6   2 34751.9 3802.31   3
  -4   6   2 32810.5 3953.76   2
   4  -6  -2 29360.0 3450.23   1
   4   6  -2 32194.9 4140.04   2
  -4  -6   2 39323.4 3919.33   7
  -4  -6   1 440.388 814.502   7
   4  -6  -1-1015.84 736.280   4
  -4   6   1 243.293 635.987   2
  -4   6   1 867.808 935.919   3
   4   6  -1 1249.10 819.627   2
  -4  -6   0 18432.0 2788.11   7
   4   6   0 25179.5 3458.63   5
   4  -6   0 21428.8 3453.25   4
   4   6   0 17732.5 2933.88   2
  -4   6   0 18201.9 3282.23   2
   4   6   1-1127.74 1447.78   5
   4   6   1 2135.69 1138.08   2
   4  -6   1-698.183 813.569   4
  -4   6  -1-1278.84 1007.01   2
  -4  -6  -1 1705.27 1375.44   7
   4  -6   2 22597.7 4121.74   4
  -4   6  -2 14089.5 3206.51   2
  -4  -6  -2 19269.2 3213.99   7
  -4  -8   3 75054.9 6559.80   7
  -4   8   2 7290.30 2730.27   2
  -4  -8   2 4146.47 1516.14   7
   4   8  -1 109135. 9024.01   2
  -4   8   1 109052. 9291.00   2
  -4  -8   1 108659. 8209.45   7
   4  -8   0 108227. 9234.91   4
  -5   1   9-1338.51 1961.33   3
   5   1  -9-1951.57 1845.11   1
   5  -1  -9 1595.96 1506.31   1
  -5   1   8 11773.6 2624.61   3
   5  -1  -8 19108.0 3708.80   1
   5   1  -8 18717.3 3613.92   1
   5   1  -7 35993.8 4529.72   1
   5  -1  -7 38377.2 4573.60   1
  -5   1   7 37358.9 4146.74   3
   5   1  -6 37418.6 4000.89   1
   5  -1  -6 28907.2 3389.63   1
  -5  -1   6 33020.9 3294.31   3
  -5   1   6 25579.8 3134.74   3
  -5  -1   5 32871.1 2957.41   7
   5   1  -5 34038.4 3049.27   5
   5   1  -5 35365.9 2762.90   2
   5   1  -5 30544.3 3169.94   1
   5  -1  -5 30831.6 3087.25   1
  -5  -1   5 32332.4 2742.44   3
  -5   1   5 34755.8 3120.26   3
  -5  -1   4 3846.36 752.798   3
  -5   1   4 4652.46 1134.62   3
   5  -1  -4 4873.00 1372.81   5
   5   1  -4 6020.33 1294.72   5
  -5   1   4 4668.77 1039.51   2
   5  -1  -4 5185.87 1148.39   4
  -5  -1   4 4723.18 1075.94   7
   5   1  -4 4511.41 1014.53   1
  -5   1   3 110983. 5362.66   3
   5  -1  -3 101840. 5658.42   5
   5  -1  -3 96925.6 5102.01   1
   5   1  -3 100283. 5385.70   5
   5   1  -3 91866.3 5476.81   4
   5  -1  -3 88992.9 5313.83   4
  -5  -1   3 93646.0 4923.46   7
  -5   1   3 92269.1 5614.84   2
   5   1  -3 97405.9 4548.60   1
  -5  -1   3 101562. 4439.96   3
   5   1  -2 13318.0 1046.56   1
   5  -1  -2 12506.2 1521.39   5
   5   1  -2 12967.2 1682.33   5
  -5   1   2 11259.4 1900.33   2
   5  -1  -2 15596.9 2022.56   4
  -5   1   2 10561.0 918.630   7
   5   1  -2 11296.0 1578.21   4
  -5  -1   2 9835.79 1373.26   6
  -5  -1   2 12268.3 1337.93   7
  -5   1   2 13543.9 1482.43   6
   5  -1  -2 13137.8 1522.32   1
   5  -1  -1 128063. 6386.07   5
   5   1  -1 127482. 6931.40   5
   5   1  -1 129066. 6600.58   4
   5  -1  -1 137709. 7272.01   4
  -5   1   1 134173. 7729.32   2
   5   1  -1 131707. 6370.97   3
  -5  -1   1 132556. 6144.61   7
   5   1   0 3833.13 1089.27   3
  -5   1   0 5787.41 1676.20   2
  -5  -1   0 6433.09 1188.73   1
   5  -1   0 5036.03 1361.63   3
   5  -1   0 5394.97 1178.21   5
   5   1   0 5505.60 1478.26   5
   5   1   0 4068.26 1114.19   4
   5  -1   0 4542.91 1370.09   4
  -5  -1   0 4058.55 929.781   7
   5   1   1 48524.8 4451.95   5
   5  -1   1 55690.3 4211.71   5
  -5  -1  -1 49545.6 4061.80   1
   5  -1   1 59570.4 4842.79   4
  -5   1  -1 59458.5 5052.70   2
   5  -1   1 54332.5 4796.29   3
   5   1   1 50612.8 4588.64   3
  -5  -1  -1 56999.7 4067.36   7
   5   1   2 67296.7 5849.33   5
  -5   1  -2 62681.5 5643.43   1
   5  -1   2 72233.1 5810.19   4
  -5   1  -2 78459.3 6240.21   2
  -5  -1  -2 75999.4 5996.56   2
   5  -1   2 55377.7 5670.52   3
   5   1   2 58340.8 5783.73   3
   5   1   3 89356.0 7492.62   5
  -5   1  -3 103096. 8030.52   1
   5  -1   3 91038.0 8153.45   3
   5   1   3 88614.6 7799.36   3
  -5   1  -4 8061.34 2376.79   1
   5  -1   4 9634.42 3042.90   3
   5   1   4 6027.70 2025.07   3
  -5  -3   8 795.898 717.311   7
  -5   3   8 1065.60 841.350   3
   5   3  -8 1583.62 1070.91   1
   5  -3  -8-724.765 1279.77   1
  -5  -3   7 1869.57 1294.74   7
  -5   3   7 781.537 705.271   3
   5  -3  -7 3444.53 1294.59   1
   5   3  -7 4112.39 1398.53   1
  -5  -3   6 86387.3 6047.58   7
   5   3  -6 96945.1 7005.25   1
   5  -3  -6 98170.5 6836.98   1
  -5   3   6 91265.9 6709.98   3
  -5  -3   5-13.7259 680.405   7
  -5   3   5 884.671 919.573   3
   5   3  -5 1062.25 873.873   1
   5  -3  -5 854.378 998.145   1
   5   3  -5 163.204 294.858   2
   5  -3  -4 14713.0 2014.34   1
  -5   3   4 10349.3 1866.52   3
   5   3  -4 13026.1 1668.48   5
   5  -3  -4 15588.5 1786.78   4
  -5   3   4 15783.1 1814.83   2
   5   3  -4 13394.4 2089.50   2
  -5  -3   4 13166.8 1787.38   7
  -5   3   3 6627.75 1450.36   2
  -5  -3   3 6200.18 1042.07   6
  -5   3   3 6532.95 1081.47   6
  -5   3   3 6887.57 1548.98   3
  -5  -3   3 5355.98 1276.59   7
   5   3  -3 5486.09 1186.52   5
   5  -3  -3 4180.58 1172.34   4
   5   3  -3 5256.62 1413.62   2
  -5  -3   2 12372.4 1785.99   7
  -5   3   2 14770.7 2423.96   2
  -5  -3   2 15437.5 1581.74   6
  -5   3   2 10432.6 1323.90   6
   5  -3  -2 12267.7 1686.05   5
   5   3  -2 15234.3 2056.83   5
   5  -3  -2 15154.7 1998.68   4
   5   3  -2 15798.7 2394.54   2
  -5   3   1 16952.3 2679.01   2
   5   3  -1 12272.8 2048.05   5
   5  -3  -1 12521.9 2066.96   4
  -5  -3   1 14719.1 1960.44   7
   5   3   0 50173.6 4531.18   5
   5  -3   0 57508.7 4801.36   4
  -5   3   0 53400.1 5111.18   2
   5   3   0 50898.0 4135.06   3
  -5  -3   0 50343.5 3980.53   7
   5   3   1 2987.31 1207.73   3
  -5   3  -1 2037.63 1324.89   2
   5  -3   1 3368.49 1345.29   4
   5   3   1 1531.37 1109.43   5
  -5  -3  -1 2733.36 1217.09   7
   5   3   2 9323.04 2077.88   3
  -5   3  -2 7789.52 2170.05   2
   5   3   2 6863.44 2082.53   5
   5  -3   2 14968.7 2952.62   4
  -5  -3  -2 10889.5 2359.34   7
   5   3   3 26665.7 4250.29   3
  -5   3  -3 29759.8 4337.45   1
   5   3   3 23837.4 3928.22   5
   5  -3   3 28419.0 4189.12   4
   5  -3   3 25422.0 4266.26   3
  -5   3  -3 25761.1 3825.54   2
  -5  -3  -3 23922.5 3592.00   7
  -5  -5   7 47630.7 4868.88   7
   5  -5  -7 54056.7 5726.05   1
  -5   5   7 51567.2 5656.10   3
  -5  -5   6 2037.04 966.887   7
  -5   5   6 248.745 453.011   3
   5   5  -6 1993.00 1072.40   2
   5  -5  -6 1340.72 1136.63   1
   5   5  -5 48822.6 4866.21   2
  -5  -5   5 45752.8 4083.74   7
  -5   5   5 47083.6 4600.39   3
   5  -5  -5 47034.7 4451.41   1
  -5  -5   4 25842.3 2989.95   7
  -5   5   4 22599.2 3034.53   3
   5  -5  -4 26140.4 3207.75   1
   5   5  -4 27088.9 3617.05   2
   5   5  -3 102272. 7550.95   2
  -5   5   3 110677. 7143.12   2
  -5   5   3 99225.3 6732.98   3
  -5  -5   3 97266.0 6406.84   7
   5  -5  -3 102998. 6744.84   1
   5  -5  -2 40454.7 4005.72   1
   5   5  -2 43922.9 3932.33   5
  -5   5   2 38207.2 3845.46   3
   5   5  -2 41083.5 4547.36   2
   5  -5  -2 40747.0 3933.79   4
  -5   5   2 39244.4 4260.29   2
  -5  -5   2 33461.0 3560.33   7
   5   5  -1 113473. 7977.86   2
   5  -5  -1 118465. 7748.90   4
  -5   5   1 122077. 8464.97   2
  -5  -5   1 115560. 7358.15   7
   5   5  -1 115288. 7538.06   5
  -5  -5   0 1142.22 1033.13   7
   5   5   0 2048.68 1087.52   2
   5   5   0 1017.56 1155.77   5
  -5   5   0 872.097 1432.89   2
   5  -5   0 1402.66 1134.48   4
   5   5   1 54962.2 5706.78   5
   5  -5   1 55192.6 5681.52   4
  -5   5  -1 61323.5 6136.78   2
  -5  -5  -1 61637.4 5369.30   7
   5   5   2 85428.9 7759.46   5
   5  -5   2 92370.6 7956.79   4
  -5   5  -2 80997.6 7492.66   2
  -5  -5  -2 85228.8 7025.23   7
  -5   5  -3 90896.1 8188.21   2
   5   7  -6 59915.0 6457.15   2
  -5  -7   5 2404.90 1111.43   7
  -5   7   5 4327.45 1776.03   3
   5   7  -5 4915.74 1790.18   2
   5  -7  -5 1308.40 1017.08   1
  -5  -7   4 15374.9 2793.64   7
  -5   7   4 15818.9 2922.78   3
   5  -7  -4 12035.5 2344.93   1
   5   7  -4 12529.7 3021.65   2
  -5  -7   3 2119.07 1268.94   7
  -5   7   3-455.829 781.626   3
  -5   7   3 1344.32 1047.14   2
   5   7  -3 824.618 717.535   2
   5  -7  -3-1408.26 1005.04   1
  -5   7   2 19034.0 3266.01   2
  -5  -7   2 19530.1 2931.03   7
   5   7  -2 22323.1 3650.49   2
  -5   7   2 20116.3 3108.84   3
  -5   7   1-32.9629 442.103   3
   5  -7  -1 2678.33 1182.99   4
   5   7  -1-542.714 1212.14   2
  -5   7   1 522.607 875.837   2
  -5  -7   1 742.755 1136.44   7
  -5   7   0 44157.9 5588.18   2
   5   7   0 50709.1 5496.55   5
   5  -7   0 45958.7 5347.51   4
  -5  -7   0 41505.4 4746.08   7
   5   7   0 35683.9 4735.15   2
   5   7   1 4437.03 1774.58   5
   6   0  -9 28261.0 4441.55   1
   6   0  -8 1879.48 1041.60   1
   6   0  -7 2981.61 1535.44   1
  -6   0   7 4711.62 1399.76   3
   6   0  -6 24800.0 3048.26   1
  -6   0   6 24112.0 2635.94   3
  -6   0   5 12289.9 1588.19   3
   6   0  -5 12277.6 1742.64   1
   6   0  -5 14915.5 2146.56   5
   6   0  -4 19187.8 2341.76   5
   6   0  -4 17342.7 2140.52   4
   6   0  -4 15445.4 1697.44   1
  -6   0   4 17912.1 1807.46   3
  -6   0   4 16649.2 1804.93   7
  -6   0   3 10343.5 1614.52   6
   6   0  -3 7586.30 1462.07   5
   6   0  -3 8944.06 1646.07   4
   6   0  -3 11906.8 1353.03   1
  -6   0   3 9813.45 1191.41   7
   6   0  -2 34777.0 2520.56   1
  -6   0   2 33066.7 2804.78   6
   6   0  -2 35867.1 3032.77   5
   6   0  -2 40725.6 3427.53   4
  -6   0   2 36721.3 2314.79   7
   6   0  -1 10155.4 1756.16   5
  -6   0   1 12125.4 2465.20   2
   6   0  -1 8774.24 1760.55   4
   6   0  -1 8251.61 1547.07   3
  -6   0   1 9100.64 1057.93   7
   6   0   0 36201.3 3536.98   5
   6   0   0 43127.1 3870.68   4
  -6   0   0 34458.3 3917.07   2
   6   0   0 28934.8 3291.63   3
  -6   0  -1 2469.08 1286.93   2
   6   0   1 3228.72 1456.24   5
   6   0   1 4649.92 1623.97   4
  -6   0  -1 2509.28 1372.90   1
   6   0   1 3446.95 1912.23   3
  -6   0  -2 18877.8 3027.45   2
   6   0   2 21901.3 3748.23   3
   6   0   3 12983.3 3300.37   3
  -6  -2   9 729.334 1191.68   7
  -6   2   9 1493.60 1739.65   3
   6  -2  -9 270.326 1655.97   1
   6   2  -9 2146.21 1399.25   1
  -6  -2   8 23796.7 3710.31   7
  -6   2   8 27049.6 3903.53   3
   6  -2  -8 24715.0 4152.95   1
   6   2  -8 26338.5 4093.59   1
  -6  -2   7 544983. 23439.7   7
   6   2  -7 583188. 24605.4   1
   6  -2  -7 502776. 23770.1   1
  -6   2   7 533614. 23792.1   3
   6   2  -6 111926. 6596.35   5
   6   2  -6 120992. 7315.63   1
   6  -2  -6 106701. 7096.23   1
  -6   2   6 97568.4 6690.79   3
  -6  -2   6 99740.1 6518.51   7
  -6  -2   5 2374.00 978.033   7
  -6   2   5 3769.18 1209.73   3
   6   2  -5 3643.82 1099.45   5
   6   2  -5 7080.33 1414.86   1
   6  -2  -5 3156.87 922.060   4
   6  -2  -5 2273.45 1109.08   1
   6   2  -5 3645.69 976.650   2
   6  -2  -4 62319.8 4754.39   5
   6   2  -4 61962.5 4373.22   5
   6   2  -4 64861.6 4751.93   2
  -6   2   4 69567.6 4635.18   3
   6  -2  -4 63668.6 4424.74   4
  -6   2   4 71654.7 4686.11   2
   6   2  -4 69117.5 3740.56   1
  -6  -2   4 63985.1 4324.75   7
  -6   2   3 948510. 34403.7   6
   6  -2  -3 924226. 34973.2   5
   6   2  -3 931777. 34996.9   5
  -6  -2   3 912802. 34282.9   6
   6  -2  -3 883830. 35195.4   4
  -6   2   3 881419. 35662.9   2
  -6   2   3 893513. 34855.9   3
  -6  -2   3 965281. 34412.3   7
   6  -2  -3 905968. 34720.4   1
   6  -2  -2 115990. 6681.73   1
  -6  -2   2 118953. 6329.00   6
  -6   2   2 118005. 6241.76   6
   6  -2  -2 126245. 6565.25   5
   6   2  -2 129879. 7226.00   5
   6   2  -2 128074. 6940.74   4
   6  -2  -2 128634. 7383.03   4
  -6   2   2 128748. 7950.86   2
   6   2  -2 126637. 5827.28   3
  -6  -2   2 126523. 6393.42   7
  -6  -2   1 7079.60 1318.44   7
  -6   2   1 7210.43 2135.35   2
   6  -2  -1 6946.06 1127.73   5
   6   2  -1 6997.26 1623.98   5
   6   2  -1 6809.77 1447.08   4
   6  -2  -1 6912.31 1833.12   4
   6   2  -1 5229.29 1235.92   3
  -6   2   0 29606.2 3884.90   2
   6   2   0 27829.5 3416.93   5
   6  -2   0 40008.0 4174.36   4
   6   2   0 34866.6 3567.76   3
  -6  -2   0 34910.5 3023.45   7
   6   2   1 472403. 21814.6   5
   6  -2   1 455360. 21869.0   4
  -6   2  -1 481795. 22385.8   2
   6   2   1 508030. 22033.2   3
  -6  -2  -1 483591. 20363.6   7
  -6   2  -2 31039.9 4184.79   2
  -6   2  -2 30165.8 4147.67   1
   6   2   2 22726.4 3848.47   3
   6  -2   2 21374.4 3630.09   4
   6   2   2 24169.2 3836.13   5
   6  -2   2 22902.3 3872.81   3
  -6   2  -3 1611.03 1334.12   1
   6   2   3-2063.31 2004.65   5
   6  -2   3 2871.52 2116.33   3
   6   2   3-729.474 1545.15   3
  -6  -4   8-144.166 816.566   7
  -6   4   8 1651.68 1053.80   3
   6  -4  -8 459.474 839.673   1
  -6  -4   7 2910.78 1466.25   7
  -6   4   7 8429.88 2075.99   3
   6  -4  -7 5410.91 1547.44   1
  -6  -4   6 6144.62 1560.58   7
  -6   4   6 6036.19 1943.69   3
   6   4  -6 5470.81 1548.02   2
   6  -4  -6 4593.67 1423.58   1
   6  -4  -5 17099.8 2678.21   1
  -6   4   5 17233.7 2755.12   3
   6   4  -5 21965.9 3055.33   2
  -6  -4   5 23408.1 2834.68   7
  -6   4   4 1084.93 817.370   2
  -6  -4   4 1417.75 1081.31   7
  -6   4   4 3192.29 1352.73   3
   6   4  -4 874.606 689.218   5
   6  -4  -4 3032.88 1072.45   1
   6  -4  -4 3345.94 1277.90   4
   6   4  -4 1716.08 1243.27   2
  -6  -4   3 16264.5 2275.12   7
  -6   4   3 17225.3 2593.62   2
  -6   4   3 15805.8 2359.35   3
   6   4  -3 16126.8 2248.10   5
   6  -4  -3 17815.1 2467.93   1
   6  -4  -3 16234.7 2462.88   4
   6   4  -3 16306.1 2598.03   2
  -6  -4   2 7448.33 1603.23   7
  -6   4   2 5119.33 1830.63   2
   6   4  -2 8887.54 1890.02   5
   6  -4  -2 4938.38 1355.17   1
   6  -4  -2 7353.04 1842.07   4
   6   4  -2 7143.14 1865.82   2
  -6   4   1 16427.2 2905.06   2
   6   4  -1 17683.5 2716.51   5
   6  -4  -1 16586.4 2670.07   4
  -6  -4   1 20325.5 2580.17   7
  -6   4   0 7663.52 2339.69   2
   6   4   0 9526.87 2153.30   5
   6  -4   0 4894.92 1912.80   4
  -6  -4   0 6893.24 1804.77   7
  -6   4  -1-1562.38 1038.44   2
   6   4   1 1556.81 1369.23   5
   6  -4   1 112.678 690.714   4
  -6  -4  -1 1016.52 979.174   7
  -6   4  -2 4947.97 1888.18   2
   6   4   2 5692.45 1948.50   5
   6  -4   2 6456.67 1996.13   4
  -6  -4  -2 5442.71 1608.28   7
   6  -6  -7 245039. 14208.2   1
  -6  -6   7 239675. 13312.1   7
  -6  -6   6 18225.9 2904.72   7
  -6   6   6 20281.0 3185.14   3
   6  -6  -6 16355.6 2878.42   1
   6   6  -6 18678.2 3198.41   2
   6   6  -5 35989.5 4583.88   2
  -6   6   5 37295.9 4427.19   3
  -6  -6   5 31504.2 3690.72   7
   6  -6  -5 35846.2 4043.31   1
  -6  -6   4 3070.71 1320.48   7
  -6   6   4 1294.42 1065.76   3
   6  -6  -4 841.972 628.872   1
   6   6  -4 2642.52 1399.27   2
   6  -6  -3 419485. 19933.3   1
  -6  -6   3 435294. 19686.7   7
   6   6  -3 437370. 21448.5   2
  -6   6   3 437863. 20686.8   2
  -6   6   3 429331. 20050.6   3
  -6  -6   2 14244.3 2416.78   7
  -6   6   2 16477.9 2857.30   3
   6   6  -2 16936.4 2701.30   5
   6  -6  -2 17803.3 2916.16   4
   6   6  -2 18076.6 3164.55   2
  -6   6   2 20948.8 3308.89   2
   6   6  -1 33726.6 4223.09   5
  -6   6   1 50964.5 5738.50   2
   6  -6  -1 33118.1 4201.20   4
   6   6  -1 37609.9 4593.19   2
  -6  -6   1 40368.2 4303.82   7
  -6   6   1 34503.2 4001.84   3
  -6   6   0 4332.01 1606.05   2
   6   6   0 1052.53 1002.40   5
   6  -6   0 2606.29 1697.06   4
  -6  -6   0-246.283 589.232   7
   6   6   1 211319. 13531.1   5
  -6   6  -1 208010. 13694.5   2
  -6   8   3 25330.8 3989.35   3
  -7  -1   9 12123.3 2583.38   7
  -7   1   9 12274.2 2680.32   3
   7  -1  -9 17766.7 3320.95   1
   7   1  -9 20440.0 3988.56   1
  -7  -1   8 5380.89 1735.86   7
  -7   1   8 6781.59 1960.53   3
   7  -1  -8 5441.98 1807.21   1
   7   1  -8 8507.61 2329.06   1
  -7  -1   7 3622.61 1365.25   7
  -7   1   7 2102.17 1010.59   3
   7   1  -7 3336.93 1676.90   1
   7  -1  -7 2477.72 1253.20   1
   7   1  -6 61069.0 4694.65   5
   7   1  -6 56773.0 4401.67   1
   7  -1  -6 50213.3 4409.80   1
  -7   1   6 61871.9 4527.86   3
  -7  -1   6 51365.8 4210.51   7
  -7  -1   5 6304.49 1347.17   7
  -7   1   5 4609.06 1079.45   3
   7  -1  -5 3334.62 1394.08   5
   7   1  -5 4669.79 1076.15   1
   7   1  -5 6386.06 1648.06   5
   7  -1  -5 5169.73 1371.85   4
   7  -1  -5 3883.62 1236.45   1
  -7  -1   4 38316.7 3200.38   6
  -7   1   4 34915.4 3078.95   6
   7  -1  -4 37184.7 3485.64   5
   7   1  -4 38915.9 3457.13   5
  -7   1   4 41492.9 3315.25   3
   7   1  -4 35736.4 3473.16   4
   7  -1  -4 43150.9 3673.78   4
  -7   1   4 38349.6 3765.72   2
   7   1  -4 35873.0 2529.40   1
   7  -1  -4 37795.0 3097.21   1
  -7  -1   4 36929.3 2975.32   7
  -7   1   4 37124.1 2676.24   7
  -7  -1   3 1737.89 621.367   7
  -7  -1   3 1666.29 856.747   6
  -7   1   3 1583.61 762.502   6
   7  -1  -3 728.695 650.794   1
   7  -1  -3 536.084 467.378   5
  -7   1   3 1702.23 1424.31   2
   7   1  -3 1798.64 1108.60   5
   7   1  -3 598.785 843.782   4
   7  -1  -3 2910.76 1293.85   4
  -7   1   2 12620.8 2658.35   2
   7  -1  -2 12241.5 1816.02   5
   7   1  -2 12217.3 1992.68   5
   7   1  -2 15359.4 2211.83   4
   7  -1  -2 14628.0 2437.76   4
  -7  -1   2 13899.2 1659.07   7
  -7   1   1 535.144 1247.15   2
   7  -1  -1 180.504 592.720   5
   7   1  -1 610.082 716.549   5
   7   1  -1 1614.70 1140.96   4
   7  -1  -1 1079.64 1038.36   4
   7   1  -1 737.596 836.917   3
  -7  -1   1 1044.12 564.657   7
   7   1   0 130710. 8604.88   5
   7  -1   0 134489. 8983.28   4
  -7   1   0 129447. 8997.80   2
  -7  -1   0 147052. 9463.11   2
   7  -1   0 134633. 8646.62   3
   7   1   0 138526. 8465.79   3
  -7   1  -1 204.594 319.084   1
  -7   1  -1-611.899 695.139   2
  -7  -1  -1-718.552 677.262   2
   7   1   1 230.133 454.652   5
   7  -1   1 862.399 1125.27   4
   7  -1   1 828.693 1191.01   3
   7   1   1-148.512 765.640   3
  -7   1  -2 457.605 1060.56   2
  -7   1  -2-1115.01 862.184   1
   7  -1   2-1459.39 1498.82   3
   7   1   2 2559.09 1421.12   3
  -7  -3   9-1070.54 1599.96   7
  -7   3   9 137.893 1065.61   3
   7  -3  -9 250.303 1814.07   1
   7   3  -9-2153.81 1156.00   1
  -7  -3   8 2777.11 1325.77   7
  -7   3   8 5792.47 1836.48   3
   7  -3  -8 5238.30 1868.25   1
  -7  -3   7 6543.36 1770.31   7
  -7   3   7 7051.15 1732.61   3
   7  -3  -7 6963.71 2045.23   1
  -7   3   6 119566. 7735.09   3
   7   3  -6 130245. 7955.07   2
   7  -3  -6 107274. 7406.04   1
  -7  -3   6 117111. 7253.81   7
  -7  -3   5 9404.54 1852.48   7
   7  -3  -5 8973.29 1930.14   1
  -7   3   5 11627.9 2084.87   3
   7   3  -5 11281.6 1847.08   5
   7  -3  -5 14779.2 2021.78   4
   7   3  -5 8343.58 1955.12   2
  -7  -3   4 119005. 6338.68   6
  -7   3   4 106278. 6117.33   6
   7   3  -4 113597. 6763.07   5
   7   3  -4 108513. 7317.78   2
   7  -3  -4 108029. 6896.26   4
  -7   3   4 120818. 7404.53   2
  -7  -3   4 107882. 6422.36   7
  -7   3   4 100532. 6730.94   3
   7  -3  -4 125278. 7061.61   1
  -7  -3   3 15507.5 1960.76   6
  -7   3   3 16514.6 1985.29   6
  -7   3   3 14437.0 2708.93   2
   7  -3  -3 17525.2 2270.28   5
   7  -3  -3 17117.2 2399.21   1
   7   3  -3 12728.9 2152.52   5
   7  -3  -3 18250.9 2642.80   4
  -7  -3   3 17922.0 2225.08   7
   7   3  -2 57931.3 4970.53   5
   7  -3  -2 62202.1 5280.23   4
  -7   3   2 60632.5 5693.43   2
  -7  -3   2 62833.4 4601.70   7
  -7   3   1 29563.3 3904.45   2
   7   3  -1 20056.7 3078.39   5
   7  -3  -1 23100.0 3423.50   4
  -7  -3   1 28834.7 3072.04   7
   7   3   0 183987. 11217.8   5
   7  -3   0 193080. 11704.6   4
  -7   3   0 202357. 12234.4   2
  -7  -3   0 192638. 10114.5   7
  -7   3  -1 12394.0 3025.14   2
   7   3   1 8234.16 2322.25   5
   7  -3   1 10039.2 2937.94   4
  -7  -3  -1 15071.1 2605.02   7
   7   3   1 11386.0 2282.35   3
  -7   3  -2 5341.46 2285.55   2
  -7   3  -2 5905.97 2008.58   1
   7   3   2 2415.89 1392.30   5
   7  -3   2 5624.37 2531.15   4
   7   3   2 5896.22 1959.15   3
  -7  -5   8 23620.5 3761.14   7
   7  -5  -8 23974.3 4039.83   1
  -7  -5   7 18402.3 2855.48   7
   7  -5  -7 19121.7 3321.11   1
  -7   5   7 16317.2 3045.41   3
  -7  -5   6 8800.38 2036.29   7
  -7   5   6 6530.48 1821.49   3
   7  -5  -6 5102.40 1561.84   1
   7   5  -6 7547.96 2047.41   2
  -7   5   5 27614.5 3558.26   3
   7  -5  -5 26688.9 3330.11   1
   7   5  -5 26292.7 3699.62   2
  -7  -5   5 23909.3 3074.44   7
  -7   5   4 1315.45 864.296   2
  -7  -5   4-117.449 982.599   7
   7  -5  -4 402.445 1007.98   1
  -7   5   4 1024.47 1203.55   3
   7   5  -4 503.779 1223.84   2
  -7  -5   3 19705.4 2817.39   7
  -7   5   3 17507.6 2918.48   2
  -7   5   3 18922.2 2987.71   3
   7   5  -3 22173.3 3068.89   5
   7  -5  -3 19520.8 2989.56   1
   7  -5  -3 17070.3 2922.53   4
   7   5  -3 20561.0 3498.33   2
  -7  -5   2-401.242 427.558   7
   7   5  -2 278.751 807.398   2
   7   5  -2 602.918 1242.32   5
   7  -5  -2 1309.32 1711.96   4
  -7   5   1 5594.42 1986.58   2
   7   5  -1 5564.54 1721.36   5
   7  -5  -1 6767.08 1871.78   4
  -7  -5   1 5521.51 1743.18   7
  -7   5   0 29514.8 4487.44   2
   7   5   0 26216.7 4188.45   5
   7  -5   0 29053.3 4149.54   4
  -7  -5   0 30303.8 3789.36   7
   7   5   1 4282.05 2075.92   5
   7  -5   1 9370.78 2403.78   4
  -7  -5  -1 9450.05 2394.51   7
  -7  -7   5 9171.95 2253.12   7
  -7   7   5 13474.6 2751.92   3
   7   7  -5 6543.68 2423.41   2
   7  -7  -5 13427.3 2614.73   1
   7  -7  -4 82770.9 6896.32   1
   7   7  -4 65988.9 7180.33   2
  -7   7   4 57555.3 6187.74   3
  -7  -7   4 79216.9 6522.38   7
  -7  -7   3 10498.5 2266.57   7
  -7   7   3 17013.4 3170.26   3
  -7   7   3 14006.4 3047.96   2
   7  -7  -3 15659.0 2973.74   1
   7   7  -3 21987.3 3934.89   2
  -7   7   2 35115.0 4456.38   3
   7  -7  -2 40431.8 5063.81   4
   7   7  -2 32767.0 4919.54   2
  -7  -7   2 41361.7 4747.09   7
  -7   7   2 42762.8 5348.85   2
  -7   7   1 19738.2 3319.42   3
   7   7  -1 15144.4 3177.17   5
   8   0  -9 247933. 14881.9   1
   8   0  -8 62235.6 5853.24   1
   8   0  -7 37991.6 3878.12   1
  -8   0   7 31797.5 3423.04   7
   8   0  -6 394101. 18026.6   5
   8   0  -6 415052. 17385.8   1
  -8   0   6 420586. 16956.5   3
  -8   0   6 369175. 16920.5   7
   8   0  -5 519651. 22676.0   5
   8   0  -5 515317. 22429.8   4
  -8   0   5 521929. 21256.3   3
   8   0  -5 553944. 21460.9   1
  -8   0   5 560920. 21488.1   7
  -8   0   4 77549.7 5109.12   6
   8   0  -4 81621.7 5633.30   5
   8   0  -4 82710.1 5741.45   4
  -8   0   4 73353.3 4375.05   7
  -8   0   4 74145.5 4680.20   3
   8   0  -4 75809.7 4483.53   1
   8   0  -3 64648.7 4138.51   1
  -8   0   3 75208.1 4974.16   6
   8   0  -3 68716.3 5095.53   5
   8   0  -3 74050.0 5455.01   4
   8   0  -2 376590. 17236.1   5
   8   0  -2 417327. 18091.3   4
  -8   0   2 375182. 18997.7   2
   8   0  -1 370706. 17169.0   5
   8   0  -1 381122. 17540.0   4
  -8   0   1 346568. 18138.0   2
  -8   0   0 22424.4 3587.61   2
   8   0   0 26229.4 3525.11   5
   8   0   0 28192.8 3704.79   4
   8   0   0 24362.3 3531.49   3
  -8   0  -1 23912.8 3785.00   2
   8   0   1 31179.7 4620.96   3
   8   0   2 126177. 10587.5   3
  -8  -2   9 10162.3 2385.46   7
  -8   2   9 17684.0 3131.64   3
   8  -2  -9 11395.1 2667.34   1
   8   2  -9 16345.9 3175.40   1
  -8  -2   8 3184.21 1604.76   7
  -8   2   8 2437.46 1224.17   3
   8  -2  -8 578.371 1293.89   1
   8   2  -8 1841.03 1061.63   1
  -8  -2   7 4027.78 1537.01   7
  -8   2   7 5272.02 1537.60   3
   8   2  -7 2627.60 936.248   5
   8  -2  -7 4282.82 1642.14   1
  -8  -2   6 10065.4 1962.53   7
  -8   2   6 12803.9 2213.71   3
   8   2  -6 13068.1 2329.95   5
   8  -2  -6 10469.9 1937.06   4
   8  -2  -6 14147.6 2270.28   1
  -8  -2   5 17284.3 2257.78   7
  -8  -2   5 18712.2 2401.01   6
  -8   2   5 23525.1 2771.63   2
  -8   2   5 18753.9 2474.13   3
   8  -2  -5 17193.8 2583.30   5
   8  -2  -5 14994.7 2245.52   1
   8   2  -5 16450.4 2371.89   5
   8  -2  -5 24399.7 2965.35   4
  -8  -2   4 5485.85 1302.88   7
   8  -2  -4 4503.95 1274.81   1
  -8  -2   4 2683.85 967.034   6
  -8   2   4 2315.37 1233.66   6
  -8   2   4 2495.56 1031.75   2
   8  -2  -4 1311.91 956.588   5
  -8   2   4 2193.01 947.678   3
   8   2  -4 3308.97 1227.79   5
   8  -2  -4 4874.11 1762.25   4
   8  -2  -3 23821.5 2681.64   1
  -8  -2   3 16521.6 2145.67   6
  -8   2   3 20625.2 2393.77   6
  -8   2   3 17896.5 3211.68   2
   8  -2  -3 18017.7 2324.02   5
   8   2  -3 16072.1 2518.54   5
   8   2  -3 19018.0 2628.22   4
   8  -2  -3 21134.2 3023.23   4
  -8  -2   3 16215.5 2067.97   7
  -8  -2   2 1925.38 935.346   7
  -8   2   2 492.132 1356.95   2
   8  -2  -2 753.590 508.424   5
   8   2  -2 1269.47 1056.82   5
   8   2  -2 735.741 584.009   4
   8  -2  -2 1873.19 1683.56   4
   8   2  -1 37356.9 4455.12   5
   8  -2  -1 41738.8 4919.91   4
  -8   2   1 41952.3 4965.34   2
   8   2  -1 42678.5 3865.47   3
  -8  -2   1 44817.0 3702.47   7
  -8   2   0 3637.35 1879.38   2
   8   2   0 1373.06 1492.61   5
   8  -2   0 2830.69 1749.63   4
   8   2   0 3916.30 1246.66   3
  -8   2  -1 2882.23 1878.57   2
  -8  -2  -1-11.0882 865.646   2
   8   2   1 1773.18 1199.06   5
  -8   2  -1 3423.45 1877.40   1
   8  -2   1 2639.54 1847.88   4
   8   2   1 4230.17 1641.39   3
   8   2   2 1853.87 1614.33   5
   8   2   2 99.8889 1194.02   3
  -8  -4   8 26933.8 3766.48   7
  -8   4   8 26560.3 3925.70   3
   8  -4  -8 17162.8 3484.89   1
   8  -4  -7 58878.1 5508.32   1
  -8   4   7 53299.3 5362.88   3
  -8  -4   7 57000.5 5134.29   7
   8   4  -6 229408. 12899.0   2
  -8   4   6 244123. 12625.6   3
   8  -4  -6 199080. 11799.2   1
  -8  -4   6 225230. 11796.7   7
   8   4  -5 364327. 16455.6   5
   8   4  -5 318256. 17433.4   2
   8  -4  -5 367997. 16572.8   4
  -8   4   5 361365. 17101.3   3
  -8  -4   5 342095. 16319.7   7
   8  -4  -5 393993. 17225.4   1
  -8  -4   4 19673.8 2642.10   7
  -8   4   4 23740.8 3229.07   2
  -8   4   4 18887.7 2884.12   3
   8   4  -4 22932.1 3554.67   2
   8   4  -4 20736.6 2773.82   5
   8  -4  -4 19610.9 2800.61   1
   8  -4  -4 18554.8 2949.09   4
   8  -4  -3 93387.4 6852.73   1
   8   4  -3 101979. 7232.37   5
   8  -4  -3 104919. 7462.79   4
  -8   4   3 94461.1 7733.45   2
  -8  -4   3 99307.4 6555.21   7
  -8   4   3 93239.6 6952.53   3
   8   4  -2 191301. 11536.1   5
   8  -4  -2 208164. 11850.3   4
  -8   4   2 188179. 12241.9   2
  -8  -4   2 203833. 10742.3   7
   8   4  -1 207388. 12437.0   5
   8  -4  -1 221492. 12892.2   4
  -8   4   1 214436. 13421.3   2
  -8  -4   1 211599. 11432.8   7
  -8   4   0 3640.13 1857.63   2
   8   4   0 10787.5 2823.81   5
   8  -4   0 7961.99 2652.57   4
  -8  -4   0 7003.21 1814.99   7
  -8   4  -1 27305.7 4579.42   2
   8  -4   1 37461.2 5396.31   4
  -8  -6   7 1221.45 1190.92   7
   8  -6  -7 3620.14 1597.49   1
  -8  -6   6 24265.3 3299.00   7
  -8   6   6 19373.9 3305.33   3
   8   6  -6 17789.2 3397.34   2
   8  -6  -6 22484.8 3473.40   1
  -8  -6   5 143.384 852.328   7
  -8   6   5 2190.96 1368.00   3
   8  -6  -5 749.364 1162.38   1
   8   6  -5 1851.82 1129.39   2
  -8  -6   4 13717.3 2558.07   7
  -8   6   4 14378.8 2946.19   3
   8  -6  -4 13736.6 2549.43   1
   8   6  -4 11347.7 3060.44   2
  -8   6   4 11652.9 2484.40   2
  -8  -6   3-2056.00 1021.77   7
  -8   6   3 1725.21 1180.71   2
  -8   6   3-13.7409 581.383   3
   8   6  -3 1619.99 903.037   5
   8  -6  -3 1292.26 1362.99   4
   8   6  -3-530.949 1063.89   2
  -8   6   2 10236.2 2754.63   2
  -8   6   2 5705.75 2066.18   3
   8   6  -2 8309.94 2142.23   5
   8  -6  -2 12881.7 3113.79   4
  -8  -6   2 6839.92 1897.96   7
   8   6  -1 7206.08 2030.35   5
   8  -6  -1 3024.55 1454.74   4
  -8  -6   1 9182.44 2496.33   7
   9   1 -10 17081.5 3642.52   1
   9   1  -9 60869.1 5999.58   1
   9  -1  -9 59336.1 6041.91   1
  -9  -1   9 46803.8 5139.74   7
  -9  -1   8 14355.1 2458.06   7
   9   1  -8 16309.4 2928.76   1
   9  -1  -8 10910.0 2217.95   1
  -9   1   7 21932.0 2882.94   7
   9   1  -7 28766.5 3445.36   5
  -9   1   7 25853.8 3087.30   3
   9   1  -7 30674.7 3308.40   1
   9  -1  -7 28057.8 3339.12   1
  -9  -1   7 30414.7 3346.22   7
  -9  -1   6-137.951 956.549   7
  -9   1   6 1552.34 819.602   7
  -9   1   6-1151.08 839.696   3
   9  -1  -6-354.143 777.873   5
   9   1  -6 1344.98 1039.96   5
   9  -1  -6 882.731 1140.14   4
   9  -1  -6 845.200 715.628   1
  -9  -1   5 62984.4 5017.24   6
  -9   1   5 64408.3 4995.32   6
   9  -1  -5 73671.9 5689.01   5
   9   1  -5 76873.9 5776.83   5
   9   1  -5 78286.2 5901.11   4
   9  -1  -5 71409.9 5646.75   4
  -9   1   5 77802.2 6135.60   2
   9  -1  -5 64937.5 4777.71   1
  -9   1   5 76706.6 5211.91   3
  -9  -1   5 71926.2 4862.36   7
  -9  -1   4 1081.33 539.628   7
  -9  -1   4 869.669 1072.87   6
  -9   1   4 2027.75 949.271   6
   9  -1  -4 2630.94 1384.13   5
  -9   1   4 3147.10 1890.13   2
   9   1  -4 2025.39 1267.07   5
   9   1  -4 2595.57 1271.94   4
   9  -1  -4 921.652 1310.04   4
   9  -1  -4 2586.38 942.264   1
  -9  -1   3 127922. 7412.18   6
  -9   1   3 113122. 7147.97   6
   9  -1  -3 119944. 7489.49   5
   9   1  -3 111780. 7598.36   5
   9   1  -3 122675. 7814.68   4
   9  -1  -3 130030. 8520.84   4
  -9   1   3 130309. 9272.99   2
   9  -1  -2 36995.1 3837.38   5
   9   1  -2 46127.9 4608.13   5
  -9   1   2 35962.0 4805.08   2
   9   1  -2 43926.6 4317.73   4
   9  -1  -2 36475.0 4610.04   4
  -9   1   1 18105.0 3430.91   2
   9   1  -1 27069.4 3839.60   5
  -9  -1   1 32328.2 4595.76   2
   9  -1  -1 29886.9 4333.55   4
   9   1  -1 26740.7 3340.92   3
  -9   1   0 3930.86 1578.89   2
  -9  -1   0 2892.87 1492.88   2
   9   1   0 4303.11 1872.29   5
   9  -1   0 4596.83 2548.92   4
   9   1   0 2351.32 1118.55   3
  -9   1  -1 90946.2 8284.60   2
   9   1   1 83516.5 8016.63   3
  -9  -3   9 11764.3 2983.42   7
  -9   3   9 15531.0 2961.03   3
   9  -3  -9 19450.4 3547.19   1
  -9  -3   8 245.079 1210.67   7
  -9   3   8 1240.69 854.320   3
   9  -3  -8 71.6534 1232.53   1
  -9  -3   7 744.389 1072.71   7
   9  -3  -7 1771.13 1008.88   1
  -9   3   7 1696.03 927.198   3
   9   3  -7 323.824 540.854   5
  -9  -3   6 14180.7 2430.62   7
  -9  -3   6 16939.6 2542.86   6
  -9   3   6 15639.1 2401.89   6
  -9   3   6 14340.6 2553.10   3
   9   3  -6 17358.0 2616.34   5
   9  -3  -6 14920.2 2560.77   1
   9  -3  -6 15400.0 2532.94   4
  -9  -3   5 11729.7 2018.44   7
  -9   3   5 9159.73 2002.33   2
  -9  -3   5 8357.16 1743.86   6
  -9   3   5 9231.35 1709.93   6
   9  -3  -5 5718.40 1537.59   5
  -9   3   5 10457.0 2250.54   3
   9   3  -5 8554.92 1897.54   5
   9  -3  -5 7156.00 2035.81   4
   9  -3  -5 13570.7 2243.23   1
  -9  -3   4 9512.01 1825.60   7
  -9  -3   4 8774.67 1772.38   6
  -9   3   4 9913.11 1680.79   6
  -9   3   4 9413.70 2465.32   2
   9  -3  -4 11631.9 1950.52   5
  -9   3   4 10964.1 2171.21   3
   9  -3  -4 10478.1 2027.98   1
   9   3  -4 12046.7 2406.38   5
   9  -3  -4 12309.8 2645.33   4
   9  -3  -3 40060.1 3979.06   1
  -9   3   3 24120.6 3903.85   2
   9   3  -3 26116.9 3650.58   5
   9  -3  -3 36449.0 4278.92   4
  -9  -3   3 26346.8 2969.17   7
  -9   3   2 5479.34 1796.58   2
   9   3  -2 2311.03 1684.38   5
   9  -3  -2 1489.93 1649.15   4
  -9  -3   2 3074.35 1154.82   7
  -9   3   1 454.321 855.948   2
   9   3  -1 2290.88 1646.20   5
   9  -3  -1 2206.73 2259.99   4
  -9   3   0 28640.4 4584.88   2
   9   3   0 19297.8 3644.08   5
   9  -3   0 24646.1 4630.61   4
  -9   5   7 40893.7 4965.66   3
   9  -5  -7 43123.7 4910.35   1
  -9  -5   7 42567.3 4669.19   7
  -9  -5   6 9044.52 2152.32   7
  -9   5   6 16584.2 2898.12   3
   9   5  -6 10123.4 2614.08   2
   9  -5  -6 10971.0 2284.85   1
   9   5  -5 82616.9 7556.53   2
  -9  -5   5 78606.6 6247.38   7
  -9   5   5 88151.0 7047.58   3
   9  -5  -5 69424.6 6178.41   1
  -9  -5   4 12260.0 2375.70   7
  -9   5   4 14981.9 3084.45   2
  -9   5   4 16323.5 3052.24   3
   9   5  -4 13629.7 2799.07   5
   9  -5  -4 16479.7 2851.51   4
   9  -5  -4 14590.8 2751.27   1
   9   5  -3 111166. 8514.07   5
   9  -5  -3 116370. 8833.55   4
  -9   5   3 112978. 9137.53   2
  -9  -5   3 119999. 8082.78   7
  -9   5   3 121426. 8589.14   3
  -9   5   2 46895.7 5910.31   2
   9   5  -2 53811.7 5717.11   5
   9  -5  -2 60755.2 6232.94   4
  -9  -5   2 57709.6 5322.33   7
  -9   5   1 37900.7 5177.61   2
   9   5  -1 28134.0 4484.27   5
   9  -5  -1 42256.1 5427.80   4
  -9  -5   1 36697.1 4457.33   7
  10   0 -10 7321.03 2339.68   1
 -10   0   9 8880.93 2423.39   7
  10   0  -9 6834.44 2386.54   1
 -10   0   8 5737.98 1568.94   7
  10   0  -8 6481.40 1713.86   1
 -10   0   7 1473.73 1054.91   7
  10   0  -7 1126.55 888.969   5
  10   0  -7 599.169 589.728   1
 -10   0   6 31478.7 3593.85   6
  10   0  -6 25897.8 3519.33   5
  10   0  -6 27956.2 3747.76   4
 -10   0   6 30512.5 3164.16   7
 -10   0   5 1919.42 1171.80   6
  10   0  -5 1483.57 1352.40   5
 -10   0   5 2878.13 1727.96   2
  10   0  -5 1331.72 1317.26   4
 -10   0   4 29109.9 3376.40   6
  10   0  -4 26255.4 3436.79   5
 -10   0   4 35102.3 4718.66   2
  10   0  -4 36935.9 4238.66   4
  10   0  -3-376.119 676.419   5
 -10   0   3 1199.07 1819.82   2
  10   0  -3 2060.50 1227.40   4
 -10   0   2 12530.9 3027.51   2
  10   0  -2 21137.3 3271.35   5
  10   0  -2 18116.6 3550.82   4
 -10   0   1 3267.61 1522.35   2
  10   0  -1 1767.92 1006.04   5
  10   0  -1-1259.41 1988.54   4
 -10   0   0 57628.5 6642.54   2
 -10  -2   9 4158.26 1507.35   7
 -10   2   9 7271.99 1879.88   3
  10  -2  -9 2735.83 1622.73   1
  10   2  -8 225454. 12640.1   5
  10  -2  -8 233218. 12940.5   1
 -10   2   8 231380. 12778.5   3
 -10  -2   8 233718. 12639.1   7
  10   2  -7 354596. 17937.0   5
  10  -2  -7 383004. 17897.6   4
  10  -2  -7 380212. 17747.4   1
 -10   2   7 400162. 18073.8   3
 -10  -2   7 373832. 17535.2   7
 -10  -2   6 41405.8 4167.52   6
 -10   2   6 39627.7 3998.35   6
  10  -2  -6 35442.5 4074.22   5
  10   2  -6 38368.9 4302.31   5
  10  -2  -6 47239.7 4689.85   4
 -10   2   6 41804.8 4085.67   3
  10  -2  -6 35762.9 3851.41   1
 -10  -2   6 45691.5 4108.63   7
 -10  -2   5 1306.07 819.486   7
  10  -2  -5 1916.28 912.817   1
 -10  -2   5 1592.83 1314.57   6
 -10   2   5 1595.66 1025.40   6
 -10   2   5 1802.58 1363.09   2
  10  -2  -5 1425.48 929.026   5
 -10   2   5 1036.34 863.098   3
  10   2  -5 2749.60 1325.90   5
  10  -2  -5-252.767 1336.18   4
  10  -2  -4 267033. 13368.5   1
 -10  -2   4 261056. 13232.4   6
 -10   2   4 296989. 13751.3   6
  10  -2  -4 289820. 14085.3   5
  10   2  -4 260638. 14091.6   5
  10   2  -4 290864. 14626.2   4
  10  -2  -4 281866. 14904.9   4
 -10   2   4 262947. 15615.3   2
 -10  -2   4 285942. 12938.8   7
  10  -2  -3 314781. 15584.7   5
  10   2  -3 326192. 16468.4   5
  10   2  -3 325490. 16176.3   4
  10  -2  -3 342996. 17373.8   4
 -10   2   3 320764. 17983.8   2
 -10   2   2 36962.8 5042.36   2
  10   2  -2 43335.4 4952.13   5
  10  -2  -2 41485.8 5304.33   4
 -10   2   1 1088.23 1524.37   2
  10   2  -1-5.53895 844.049   5
  10  -2  -1 2353.89 1863.29   4
  10   2   0 93610.9 8581.53   5
  10  -2   0 95210.3 9362.71   4
 -10   2   0 88956.0 8471.68   2
 -10  -2   0 84510.2 8499.55   2
 -10  -4   8 335.625 1085.84   7
 -10   4   8 1681.39 1441.60   3
  10  -4  -8 1978.17 1455.72   1
 -10  -4   7 4283.52 1860.49   7
 -10   4   7 2321.54 1364.48   3
  10  -4  -7 4346.18 1411.83   1
 -10  -4   6 7809.04 2020.88   7
 -10   4   6 5343.88 1992.65   3
  10   4  -6 8891.46 2071.29   5
  10  -4  -6 9099.58 2237.86   4
  10  -4  -6 11361.3 2288.48   1
 -10  -4   5 6939.73 1795.45   7
  10  -4  -5 6794.83 1870.23   1
 -10   4   5 5760.54 1854.47   2
 -10   4   5 2177.32 1563.02   3
  10   4  -5 5203.83 1788.34   5
  10  -4  -5 7581.93 2342.38   4
 -10  -4   4 8792.67 2044.17   7
 -10   4   4 10514.0 2981.97   2
 -10   4   4 12014.2 2671.14   3
  10   4  -4 9940.82 2425.64   5
  10  -4  -4 8897.28 2606.32   4
  10  -4  -4 14662.2 2584.58   1
 -10  -4   3 317.436 1136.18   7
 -10   4   3 932.677 1324.54   2
  10   4  -3 677.879 662.157   5
  10  -4  -3 316.465 1584.03   4
 -10   4   2 4338.36 1737.30   2
  10   4  -2 4018.24 1635.37   5
  10  -4  -2 3451.78 1816.87   4
 -10  -4   2 6029.69 1739.79   7
  10   6  -6 56370.4 6673.96   2
  10   6  -4 80920.7 7424.48   5
  10  -6  -4 104489. 8581.92   4
 -10   6   4 93979.6 8237.86   2
 -11   1  10 17226.6 3260.70   7
  11  -1 -10 19799.2 3917.26   1
 -11  -1   9 14104.4 2673.88   7
 -11   1   9 10000.6 2080.37   7
  11  -1  -9 11008.6 2320.98   1
 -11  -1   8 10410.6 2109.38   7
  11   1  -8 12160.7 2500.53   5
  11  -1  -8 12567.1 2228.55   1
 -11  -1   7 3299.81 1292.87   7
 -11  -1   7-968.012 1078.67   6
 -11   1   7 46.2794 755.925   6
  11  -1  -7 901.476 669.895   1
  11  -1  -7 1251.74 938.379   5
  11   1  -7 400.399 886.131   5
  11  -1  -7 379.518 971.345   4
 -11  -1   6 29810.5 3751.02   6
 -11   1   6 37885.7 3957.63   6
  11  -1  -6 27979.1 3803.78   5
 -11   1   6 30284.9 4036.65   2
  11   1  -6 26256.6 3776.66   5
  11   1  -6 31899.4 4242.49   4
  11  -1  -6 28505.5 4071.94   4
 -11  -1   6 32467.6 3367.52   7
  11  -1  -6 29937.8 3279.53   1
 -11  -1   5 4225.33 1560.76   6
 -11   1   5 3947.04 1636.70   6
  11  -1  -5 3561.97 1577.20   5
 -11   1   5 4867.41 1555.67   3
 -11   1   5 10710.1 2458.21   2
  11   1  -5 5323.31 1725.52   5
  11   1  -5 6858.04 2198.26   4
  11  -1  -5 4657.14 1925.17   4
 -11  -1   4 36351.7 4208.93   6
 -11   1   4 53559.0 4862.10   6
  11  -1  -4 50479.1 4935.71   5
  11   1  -4 46088.0 4829.42   5
  11   1  -4 48824.9 5201.16   4
  11  -1  -4 44850.0 5255.41   4
 -11   1   4 46192.1 5751.10   2
 -11   1   3 9230.50 2834.65   2
  11  -1  -3 7464.52 1812.25   5
  11   1  -3 5736.06 1959.46   5
 -11  -1   3 12482.1 3153.42   2
  11   1  -3 8256.13 2203.59   4
  11  -1  -3 4857.14 2219.11   4
 -11   1   2 11047.2 3209.78   2
  11   1  -2 11816.4 3060.90   5
 -11  -1   2 9437.86 2913.40   2
  11  -1  -2 9881.94 2826.29   4
 -11   1   1 28667.9 4565.61   2
 -11  -1   1 26628.4 4672.42   2
  11   1  -1 29208.7 4392.32   5
  11  -1  -1 20992.7 4568.94   4
  11  -3  -9-1684.36 950.648   1
 -11   3   9-966.625 779.388   3
  11   3  -8 38107.1 4592.55   5
 -11   3   8 45726.6 5081.20   3
  11  -3  -8 52441.0 5292.81   1
 -11  -3   8 46490.5 4981.13   7
 -11  -3   7 15303.1 2753.10   7
 -11  -3   7 17746.4 2931.79   6
 -11   3   7 21206.8 3142.55   6
 -11   3   7 16867.8 2954.06   3
  11   3  -7 17485.5 3106.08   5
  11  -3  -7 14906.3 2855.68   1
  11  -3  -7 24735.4 3553.72   4
 -11  -3   6 66100.4 5584.14   6
 -11   3   6 78638.6 5879.25   6
  11  -3  -6 61950.6 5826.54   5
  11   3  -6 69134.3 6213.12   5
  11  -3  -6 72805.7 6373.09   4
 -11  -3   6 74276.8 5804.87   7
 -11   3   6 77685.3 6380.92   3
  11  -3  -6 72070.2 6008.55   1
  11  -3  -5 47433.8 4459.02   1
 -11   3   5 37113.3 3854.28   6
 -11  -3   5 27908.8 3406.65   6
 -11   3   5 38272.8 4846.04   2
  11  -3  -5 27350.1 3625.66   5
  11   3  -5 29383.9 3949.59   5
  11  -3  -5 34983.4 4434.09   4
 -11  -3   5 35258.3 3782.43   7
 -11   3   5 33199.9 4040.36   3
  11   3  -4 104544. 8047.67   5
  11  -3  -4 94076.4 8131.41   4
 -11   3   4 104082. 9161.24   2
 -11  -3   4 97632.0 6808.62   7
 -11   3   3 2392.43 2154.82   2
  11   3  -3 1547.66 1118.85   5
  11  -3  -3 4163.70 2233.28   4
 -11   3   2 42509.1 5879.25   2
  11   3  -2 43402.3 5468.59   5
  11  -3  -2 52208.9 6502.39   4
 -11  -5   6 2945.40 1358.92   7
  11  -5  -6 4915.42 2163.17   1
 -11   5   6 1513.98 1652.97   3
 -11  -5   5 869.957 950.781   7
 -11   5   5 3190.32 1452.79   3
  11  -5  -5 1703.62 985.677   1
  11   5  -5 986.643 742.274   5
  11  -5  -5 1732.14 1928.89   4
 -11  -5   4 7240.27 2000.90   7
 -11   5   4 4172.82 1674.17   2
  11   5  -4 5810.71 1845.93   5
  11  -5  -4 5706.63 2870.32   4
 -12   0  10 282108. 15451.0   7
  12   0  -9 53767.0 5766.91   5
 -12   0   9 53046.2 5091.51   7
 -12   0   8 12990.4 2791.69   6
  12   0  -8 18123.6 3146.85   5
 -12   0   7 6523.69 1988.26   6
  12   0  -7 3804.78 1667.27   5
  12   0  -7 6941.71 2415.56   4
 -12   0   6 525199. 22944.6   6
  12   0  -6 509508. 23928.5   5
  12   0  -6 513352. 24374.8   4
 -12   0   6 484726. 24776.9   2
 -12   0   5 44324.0 4757.78   6
  12   0  -5 53134.1 5280.72   5
 -12   0   5 34757.7 5339.08   2
  12   0  -5 42563.8 5200.75   4
  12   0  -4 18670.5 3541.07   5
 -12   0   4 20669.8 4067.96   2
  12   0  -4 21730.2 3867.06   4
 -12   0   3 2334.35 1896.05   2
  12   0  -3 123.699 795.207   5
  12   0  -3 785.532 1280.53   4
  12   0  -2 261562. 15941.6   4
 -12   0   2 271808. 16896.5   2
 -12  -2   9 18731.7 3142.13   7
  12  -2  -9 18658.6 3390.93   1
  12   2  -9 13422.6 2830.44   5
 -12  -2   8-1107.70 1035.63   7
 -12  -2   8 721.681 1165.21   6
 -12   2   8 264.866 1440.07   6
  12   2  -8-213.919 678.911   5
  12  -2  -8 302.674 976.894   1
  12  -2  -8 1357.97 1595.74   4
 -12  -2   7 9927.70 2293.04   7
 -12  -2   7 11894.7 2404.24   6
 -12   2   7 11216.7 2537.79   6
 -12   2   7 8773.66 2115.00   3
  12  -2  -7 8585.31 2067.12   5
  12   2  -7 10557.6 2362.67   5
  12  -2  -7 6984.07 2377.62   4
  12  -2  -7 9671.85 2204.19   1
 -12  -2   6-95.0594 414.952   6
 -12   2   6-654.043 960.587   6
 -12   2   6-1157.74 1060.98   3
  12  -2  -6 613.408 744.133   5
  12   2  -6-678.823 1221.16   5
  12  -2  -6 179.608 1275.39   4
  12  -2  -6 343.041 958.870   1
  12  -2  -5 29559.1 3603.88   1
 -12  -2   5 23793.5 3403.97   6
 -12   2   5 25161.9 3512.95   6
 -12   2   5 21411.5 4348.35   2
  12  -2  -5 23433.6 3433.45   5
 -12   2   5 26626.4 3530.61   3
  12   2  -5 28809.5 4111.84   5
  12   2  -5 26946.8 3876.33   4
  12  -2  -5 33785.6 4664.35   4
 -12   2   4-84.3388 1055.78   2
  12   2  -4-459.745 743.764   5
  12   2  -4-181.750 396.666   4
  12  -2  -4 240.425 1604.40   4
 -12   2   3 25469.5 4634.88   2
  12   2  -3 25002.6 3899.77   5
  12  -2  -3 28278.0 4832.41   4
 -12   4   8 24624.2 3987.88   3
 -12  -4   7 379.773 635.342   7
  12  -4  -7-296.031 686.407   1
 -12   4   7 470.544 705.990   3
  12   4  -7 684.161 1325.08   5
  12  -4  -6 321957. 17133.2   1
  12   4  -6 345650. 18001.4   5
  12  -4  -6 332139. 17710.0   4
 -12  -4   6 319547. 16590.2   7
 -12   4   6 352198. 17838.0   3
 -12  -4   5 18333.3 2911.63   7
 -12   4   5 18516.1 3606.31   2
 -12   4   5 20628.5 3730.20   3
  12   4  -5 21555.1 3860.14   5
  12  -4  -5 18673.7 3162.71   1
  12  -4  -5 27438.2 4779.21   4
 -12   4   4 33305.8 5289.42   2
 -13  -1   9 66444.9 6699.89   6
 -13   1   9 62967.8 6371.25   6
  13   1  -9 63355.1 6485.35   5
 -13  -1   9 59693.6 5820.08   7
 -13  -1   8 3449.61 1630.27   6
 -13   1   8 4093.75 1641.39   6
  13  -1  -8 4822.33 2107.92   5
  13   1  -8 3740.78 1642.94   5
  13  -1  -8 9203.21 2818.59   4
 -13  -1   7 52919.4 5302.58   6
 -13   1   7 49903.3 5264.30   6
  13  -1  -7 58274.2 5975.55   5
  13   1  -7 55534.2 6028.89   5
  13  -1  -7 57062.9 6409.63   4
 -13  -1   6 6484.58 1978.90   6
 -13   1   6 4160.58 1839.39   6
 -13   1   6 6512.56 2508.06   2
  13  -1  -6 4597.55 1897.13   5
  13   1  -6 4908.99 2158.47   5
  13   1  -6 3204.97 1915.92   4
  13  -1  -6 6183.15 2594.58   4
 -13   1   5 17478.1 3966.83   2
  13  -1  -5 20663.9 3700.51   5
  13   1  -5 21712.9 3687.41   5
 -13  -1   5 17085.2 3617.15   2
  13   1  -5 20012.0 3689.67   4
  13  -1  -5 21813.1 4226.84   4
 -13   1   4 8397.25 3133.72   2
  13  -1  -4 7779.71 2474.04   5
  13   1  -4 6641.65 2052.40   5
 -13  -1   4 5119.00 3119.19   2
  13   1  -4 6029.98 2081.01   4
  13  -1  -4 9113.43 2925.44   4
  13   3  -9 20045.3 3578.04   5
 -13  -3   8 3430.02 1785.88   7
 -13  -3   8-899.920 1610.83   6
 -13   3   8 1636.17 908.678   6
 -13   3   8-15.2000 869.356   3
  13   3  -8 3148.77 1389.42   5
  13  -3  -8 1812.37 1531.27   4
  13  -3  -8 777.628 1381.56   1
 -13  -3   7 11480.3 2552.50   7
 -13  -3   7 6287.31 1877.23   6
 -13   3   7 7851.47 2149.36   6
 -13   3   7 9295.02 2301.08   3
  13  -3  -7 12205.4 2586.88   5
  13   3  -7 6388.66 2261.62   5
  13  -3  -7 12064.6 2927.84   4
  13  -3  -7 7475.69 1971.29   1
 -13  -3   6 593.324 576.568   6
 -13   3   6 3084.26 1640.32   6
  13  -3  -6 3433.49 1814.88   1
  13  -3  -6 5632.35 2055.91   5
 -13   3   6 955.289 1309.05   3
  13   3  -6 2909.46 1375.97   5
  13  -3  -6 2195.90 2151.20   4
 -13   3   5 361.136 1058.21   2
 -13   3   5 2609.48 1634.29   3
  13   3  -5-411.742 1166.66   5
  13  -3  -5 656.850 1745.20   4
 -14   0   8 20060.0 3360.11   6
  14   0  -8 16890.4 3394.56   5
  14   0  -8 23820.4 4154.60   4
 -14   0   7 2649.56 1418.86   6
  14   0  -7 187.807 1484.81   5
  14   0  -7 2862.81 2131.14   4
 -14   0   6 19560.4 3509.48   6
  14   0  -6 25667.2 4235.61   5
 -14   0   6 19662.0 3902.17   2
  14   0  -6 22911.4 4275.21   4
  14   0  -5 2024.72 1470.15   5
 -14  -2   7 10434.0 2885.69   6
 -14   2   7 9436.83 2491.47   6
  14  -2  -7 6537.76 2109.21   5
  14  -2  -6 73190.8 7079.10   5
 -14   2   6 70217.8 7967.31   2
   0   0   0    0.00    0.00   0
TITL 250214_c2 in C2/m
REM C2/m (#12 in standard setting)
CELL 0.71073  11.376617   6.648798   7.914568  90.0000 134.4612  90.0000
ZERR    2.00   0.001026   0.000217   0.000723   0.0000   0.0160   0.0000
LATT  7
SYMM -x, y,-z
SFAC S V
UNIT 16.00 10.00
TREF
HKLF 4
END
;
_shelx_hkl_checksum               73109
_olex2_computing_structure_refinement_long 'ShelXL (Sheldrick, 2008)'
_olex2_computing_structure_solution_long 'ShelXS (Sheldrick, 2008)'
_olex2_submission_special_instructions 'No special instructions were received'
